1  
2  
3 **Caspase-4/11 exacerbates disease severity in SARS-CoV-2 infection**  
4 **by promoting inflammation and thrombosis**  
5

6 Mostafa Eltobgy<sup>1,2\*</sup>, Ashley Zani<sup>1,2\*</sup>, Adam D. Kenney<sup>1,2</sup>, Shady Estfanous<sup>1,2</sup>, Eunsoo Kim<sup>2,3</sup>  
7 Asmaa Badr<sup>1,2</sup>, Cierra Carafice<sup>1,2</sup>, Kylene Daily<sup>1,2</sup>, Owen Whitham<sup>1,2</sup>, Maciej Pietrzak<sup>4</sup>, Amy  
8 Webb<sup>4</sup>, Jeffrey Kawahara<sup>1,2</sup>, Adrian C. Eddy<sup>1,2</sup>, Parker Denz<sup>1,2</sup>, Mijia Lu<sup>2,3</sup>, Mahesh KC<sup>2,5</sup>, Mark  
9 E. Peeples<sup>2,5</sup>, Jianrong Li<sup>2,3</sup>, Jian Zhu<sup>2,6</sup>, Jianwen Que<sup>7</sup>, Richard Robinson<sup>1,2</sup>, Oscar Rosas  
10 Mejia<sup>1,2</sup>, Rachael E. Rayner<sup>2,3</sup>, Luanne Hall-Stoodley<sup>1,2</sup>, Stephanie Seveau<sup>1,2</sup>, Mikhail A.  
11 Gavrilin<sup>2</sup>, Andrea Tedeschi<sup>8</sup>, Santiago Partida-Sanchez<sup>9</sup>, Frank Roberto<sup>9</sup>, Emily A. Hemann<sup>1,2</sup>,  
12 Eman Abdelrazik<sup>10</sup>, Adriana Forero<sup>1,2</sup>, Shahid M. Nimjee<sup>11</sup>, Prosper Boyaka<sup>2,3</sup>, Estelle Cormet-  
13 Boyaka<sup>2,3</sup>, Jacob S. Yount<sup>1,2#</sup> and Amal O. Amer<sup>1,2#</sup>.

14  
15 <sup>1</sup>Department of Microbial Infection and Immunity, The Ohio State University College of  
16 Medicine, Columbus, OH, USA

17 <sup>2</sup>Infectious Diseases Institute, The Ohio State University, Columbus, OH, USA

18 <sup>3</sup>Department of Veterinary Biosciences, The Ohio State University, Columbus, OH, USA

19 <sup>4</sup>Department of Biomedical Informatics, The Ohio State University, Columbus, OH, USA

20 <sup>5</sup>Center for Vaccines and Immunity, Abigail Wexner Research Institute at Nationwide Children's  
21 Hospital, Columbus, OH, USA

22 <sup>6</sup>Department of Pathology, The Ohio State University, Columbus, OH, USA

23 <sup>7</sup>Division of Digestive and Liver Diseases and Center for Human Development, Department of  
24 Medicine, Columbia University, New York, NY, USA

25 <sup>8</sup>Department of Neuroscience, Chronic Brain Injury Discovery Theme, The Ohio State  
26 University, Columbus, OH, USA

27 <sup>9</sup>Abigail Wexner Research Institute at Nationwide Children's Hospital, Columbus, OH, USA

28 <sup>10</sup>Center for Informatics Science (CIS), Nile University, Giza, Egypt

29 <sup>11</sup>Department of Neurological Surgery, The Ohio State University, Columbus, OH, USA

30  
31 \*These authors contributed equally to this work.

32 #Address correspondence to Amal O. Amer, [Amal.Amer@osumc.edu](mailto:Amal.Amer@osumc.edu),  
33 and Jacob S. Yount, [Jacob.Yount@osumc.edu](mailto:Jacob.Yount@osumc.edu)

34  
35

## 36 **Abstract**

37 SARS-CoV-2 is a worldwide health concern, and new treatment strategies are needed <sup>1</sup>.  
38 Targeting inflammatory innate immunity pathways holds therapeutic promise, but effective  
39 molecular targets remain elusive. Here, we show that human caspase-4 (CASP4), and its mouse  
40 homologue, caspase-11 (CASP11), are upregulated in SARS-CoV-2 infections, and that *CASP4*  
41 expression correlates with severity of SARS-CoV-2 infection in humans. SARS-CoV-2-infected  
42 *Casp11<sup>-/-</sup>* mice were protected from severe weight loss and lung pathology, including blood vessel  
43 damage, compared to wild-type (WT) and gasdermin-D knock out (*Gsdmd<sup>-/-</sup>*) mice. GSDMD is a  
44 downstream effector of CASP11 and CASP1. Notably, viral titers were similar in the three  
45 genotypes. Global transcriptomics of SARS-CoV-2-infected WT, *Casp11<sup>-/-</sup>* and *Gsdmd<sup>-/-</sup>* lungs  
46 identified restrained expression of inflammatory molecules and altered neutrophil gene signatures  
47 in *Casp11<sup>-/-</sup>* mice. We confirmed that protein levels of inflammatory mediators IL-1 $\beta$ , IL6, and  
48 CXCL1, and neutrophil functions, were reduced in *Casp11<sup>-/-</sup>* lungs. Additionally, *Casp11<sup>-/-</sup>* lungs  
49 accumulated less von Willebrand factor, a marker for endothelial damage, but expressed more  
50 Kruppel-Like Factor 2, a transcription factor that maintains vascular integrity. Overall, our results  
51 demonstrate that CASP4/11, promotes detrimental SARS-CoV-2-associated inflammation and  
52 coagulopathy, largely independently of GSDMD, identifying CASP4/11 as a promising drug target  
53 for treatment and prevention of severe COVID-19.

54

## 55 **Main**

56 Severe acute respiratory syndrome coronavirus 2 (SARS-CoV-2) is the causative infectious agent  
57 of the worldwide COVID-19 pandemic<sup>1</sup>. SARS-CoV-2 is a positive sense single-stranded RNA  
58 virus that can induce hyper-inflammatory responses, including cytokine storm, in the lungs as well  
59 as extra-pulmonary organs in severe cases<sup>2</sup>. IL-6, CXCL1, IL-1 $\alpha$ , IL-1 $\beta$  and type I interferons,  
60 among other cytokines, are thought to contribute to pathological manifestations of the SARS-CoV-  
61 2 infection<sup>3</sup>. In addition, formation of thrombi that can cause myocardial infarction, stroke and  
62 pulmonary embolism is a hallmark of severe Covid-19. Endothelial and neutrophil dysfunctions  
63 during SARS-CoV-2 infection increase the incidence of thromboembolic complications<sup>4</sup>.  
64 Thrombus formation is initiated by von Willebrand factor (VWF), a glycoprotein released by  
65 damaged endothelial cells and megakaryocytes<sup>5,6</sup>. VWF also self-associates, forming strings  
66 protruding into the lumen serving as a scaffold for platelet adhesion and aggregation<sup>6</sup>. Cellular  
67 sensors of infection, such as Toll-like receptor 2 (TLR2), C-type lectin receptors, and the NLRP3  
68 inflammasome have been implicated in triggering the induction and secretion of cytokines and  
69 inflammatory lung damage in SARS-CoV-2 infections<sup>7</sup>. However, the contribution of these

70 pathogen-sensing pathways and other inflammasome components in mediating host defense  
71 versus immune-mediated pathology and thrombosis during SARS-CoV-2 infection *in vivo* remains  
72 unclear<sup>7</sup>. While effector molecules downstream of infection-sensing pathways, such as specific  
73 inflammatory cytokines, have been targeted in attempts to limit virus-induced tissue damage,  
74 most of these strategies failed to exert major benefits in human clinical trials<sup>8</sup>. Therefore,  
75 strategies targeting molecules upstream of multiple inflammatory cytokines or chemokines may  
76 be more effective, though this remains to be experimentally tested. Here, we investigate the role  
77 of a major member of the non-canonical inflammasome, caspase-11 (CASP11), and its  
78 downstream effector Gasdermin D (GSDMD) in SARS-CoV-2 infection and disease severity using  
79 knockout mouse models and mouse-adapted SARS-CoV-2.

80 Caspases are a family of cysteine proteases that specifically cleave their substrates at the  
81 C-terminal side of aspartic acid residues. CASP11 is a murine protein that is critical for defense  
82 against bacterial pathogens. Human caspase-4 (CASP4) displays high homology to murine  
83 CASP11<sup>9,10</sup> and we have demonstrated that human CASP4 mediates many functions of mouse  
84 CASP11 in macrophages during bacterial infections<sup>9</sup>. CASP4/11 is a component of the non-  
85 canonical inflammasome with multiple functions that remain to be fully characterized. One major  
86 role for this protein is the cleavage of GSDMD<sup>11</sup>. Once cleaved, the GSDMD N-terminal fragment  
87 inserts into the plasma membrane of eukaryotic cells to form pores that allow the release of IL-1 $\beta$   
88 and other molecules, sometimes leading to cell lysis and death known as pyroptosis<sup>12</sup>.  
89 Interestingly, accumulating evidence has posited potential roles for GSDMD downstream of  
90 caspases in mediating inflammatory pathology during SARS-CoV-2 infection<sup>13</sup>. SARS-CoV-2  
91 infection studies in GSDMD genetically deficient animal models have not yet been performed,  
92 though clinical trials testing inhibitors of GSDMD in COVID-19 patients were not promising<sup>8</sup>.  
93 Likewise, the role of CASP4/11 in viral infections has not been explored, despite the induction of  
94 these proteins by the antiviral type I and II interferons<sup>8</sup>. This notable induction by interferons and  
95 the broad roles of CASP4/11 in regulating diverse inflammatory pathologies, including bacterial  
96 infections, gouty arthritis, and gastroenteritis<sup>10</sup>, prompted us to investigate its role in SARS-CoV-  
97 2 infections.

98

## 99 **Results**

### 100 **CASP4/11 expression is elevated in the lungs during SARS-CoV-2 infections of mice and** 101 **humans and correlates with disease severity in humans**

102 CASP4/11 is weakly expressed or absent in resting cells, but is induced in response to bacterial  
103 infections<sup>14</sup>. The analysis of publicly available RNA sequencing data of nasopharyngeal swab

104 material from subjects with SARS-CoV-2 and healthy donors (GEO accession: GSE163151),  
105 revealed that *CASP4* is highly expressed in the airway of SARS-CoV-2-infected patients, and that  
106 expression levels increase with disease severity (**Fig. 1a**). Additionally, we found that human lung  
107 sections from COVID-19 patients show higher levels of *CASP4* staining compared with healthy  
108 lung controls (**Fig. 1b**), owing to greater numbers of *CASP4* positive cells in the infected lung  
109 tissue (**Fig. 1c**). We then performed intranasal infection of C57BL/6 wild-type (WT) mice with  
110 pathogenic mouse-adapted SARS-CoV-2 (strain MA10)<sup>15</sup>, and found that infection strongly  
111 induces *Casp11* expression throughout murine lung tissue within 4 days of infection as detected  
112 by RNAscope *in situ* hybridization (ISH) (**Fig. 1d**) and confirmed by qRT-PCR (**Fig. 1e**). The level  
113 of *CASP11* protein, likewise, went from below detection to highly-expressed in response to SARS-  
114 CoV-2 infection of murine lungs (**Fig. 1f**). We further examined infection of K18-hACE2 mice  
115 expressing the human ACE2 receptor using human isolate SARS-CoV-2 strain USA-WA1/2020  
116 (WA1). Similar to mouse adapted SARS-CoV-2, the non-adapted human virus strongly induced  
117 the lung expression of *CASP11* as demonstrated by qRT-PCR (**Fig. 1g**)<sup>16</sup>. Overall, *CASP4* is  
118 highly expressed in the lungs of COVID-19 patients, and *CASP11* is similarly induced upon  
119 SARS-CoV-2 infection of mice.

120

### 121 ***Casp11* deficiency reduces disease severity in SARS-CoV-2-infected mice**

122 We next examined whether *CASP11* regulates disease severity caused by SARS-CoV-2  
123 infection. Wild-type (WT), *Casp11*<sup>-/-</sup> and *Gsdmd*<sup>-/-</sup>, and mice were infected with SARS-CoV-2  
124 MA10 for comparison of weight loss, a commonly used indicator of overall infection severity in  
125 mice<sup>16</sup>. We found that WT mice lost a significant percentage of their body weight between days  
126 1 and 4 post-infection, followed by partial recovery of weight up to day 7, at which point we ended  
127 our experiments (**Fig. 2a**). *Casp11*<sup>-/-</sup> mice, on the other hand, lost weight only up to day 3, and  
128 then rapidly recovered fully to their original weight by day 5 (**Fig. 2a**). In comparison, weight loss  
129 of *Gsdmd*<sup>-/-</sup> mice was not significantly different from that of WT mice (**Fig. 2a**). These data indicate  
130 that *CASP11* promotes disease severity during SARS-CoV-2 infection, and that this function is  
131 not mediated by GSDMD.

132 To determine whether differences in disease severity could be explained by differences in  
133 viral replication, we quantified live virus titers in WT, *Casp11*<sup>-/-</sup> and *Gsdmd*<sup>-/-</sup> mouse lungs at 2 and  
134 4 days post-infection. We found that viral loads were similar with no statistical difference between  
135 the mice genotypes at either time point (**Fig. 2b**). We also observed that, in agreement with  
136 previous reports<sup>17</sup>, viral titers were decreased at day 4 compared with day 2 in all groups,  
137 demonstrating that neither *CASP11* nor GSDMD are required for viral clearance mechanisms

138 **(Fig. 2b)**. To corroborate these findings, lung sections from WT and *Casp11*<sup>-/-</sup> mice were stained  
139 for SARS-CoV-2 nucleocapsid protein and similar staining patterns were observed with prominent  
140 infection of cells lining the airways and neighboring alveoli (**Fig. 2c**). Overall, these results  
141 demonstrate that loss of CASP11, but not GSDMD, prevents severe disease in SARS-CoV-2  
142 infection without affecting virus replication or clearance.

143

#### 144 ***Casp11*<sup>-/-</sup> SARS-CoV-2-infected lungs elicit specific inflammatory gene signatures**

145 To examine global transcriptional effects of CASP11 and GSDMD in the lung during SARS-CoV-  
146 2 infections, we infected WT, *Casp11*<sup>-/-</sup> and *Gsdmd*<sup>-/-</sup> mice, and performed RNA sequencing on  
147 lung RNA at 2 days post-infection. Day 2 was chosen because it is the peak of virus replication in  
148 the lungs of mice<sup>15</sup>. No similarity between the gene signatures obtained from WT, *Casp11*<sup>-/-</sup> and  
149 *Gsdmd*<sup>-/-</sup> infected lungs were seen using dimensionality reduction approaches, while the *Casp11*<sup>-/-</sup>  
150 <sup>-/-</sup> infected lung profiles showed greater divergence in gene expression patterns (**Fig. 2d**). We  
151 contrasted the significant gene expression changes (p-value <0.05) in infected *Casp11*<sup>-/-</sup> and  
152 *Gsdmd*<sup>-/-</sup> lungs relative to WT mice to understand how these deficiencies impact the  
153 transcriptional landscape in terms of differentially expressed genes (DE, either significantly  
154 upregulated or downregulated) (**Supplementary Fig. 1a**). Functional analysis of DE genes in  
155 *Casp11*<sup>-/-</sup> versus WT lungs revealed an enrichment for genes corresponding to immunological  
156 pathways involved in cytokine production and inflammation (red), immune cell migration and  
157 activation (orange), cell adhesion (pink), and ERK1/2 signaling (green) (**Fig. 2e**). In accordance  
158 with known actin polymerization regulation imparted by CASP11, the absence of *Casp11* in  
159 SARS-CoV-2 infection also resulted in changes in genes involved in actin regulatory pathways  
160 (blue) (**Fig. 2e**)<sup>9,18,19</sup>. Since sensing of virus replication by cells generally induces interferon (IFN)-  
161 mediated antiviral responses and the expression of inflammatory cytokines, we investigated  
162 whether CASP11 or GSDMD shape the antiviral gene program during SARS-CoV-2 infection.  
163 First, we specifically examined the expression of IFN-stimulated genes (ISGs), which are  
164 abundantly upregulated by type I IFN stimulation in murine airway epithelial cells<sup>20</sup>. Deficiency of  
165 CASP11 or GSDMD did not result in differential ISG (LFC |0.58|; p-value <0.05) expression  
166 relative to WT infected lungs (**Supplementary Fig. 1b,c**).

167 Specific examination of cytokine and chemokine genes revealed a statistically significant  
168 downregulation of several important inflammatory mediators in the absence of *Casp11* including  
169 cytokines *Il1b*, *Il1a*, and *Il1f9*, and chemokines *Cxcl1*, *Cxcl2*, *Cxcl14*, *Cxcl3*, *Cxcl5*, and *Ccl3* (**Fig.**  
170 **2f**). These findings are consistent with ERK activation downstream of CXCL1 and CXCL3  
171 signaling as highlighted in (**Fig. 2e**). Knockout of *Gsdmd*, had less impact on the magnitude of

172 cytokine and chemokine expression compared to *Casp11* knockout (**Fig. 2f**). Overall, our results  
173 demonstrate that CASP11 controls a specific subset of inflammatory responses during SARS-  
174 CoV-2 infection.

175

### 176 **CASP11 promotes the production of specific inflammatory mediators in response to** 177 **SARS-CoV-2 *in vivo* and *in vitro***

178 To examine the role of CASP11 in mediating the pathological hallmarks of SARS-CoV-2  
179 pulmonary infection, lung sections from infected WT, *Casp11*<sup>-/-</sup> and *Gsdmd*<sup>-/-</sup> mice were fixed and  
180 stained with hematoxylin and eosin (H&E). Sections from all infected animals showed areas of  
181 consolidated lung tissue indicative of cellular infiltration and inflammation that was absent in non-  
182 infected control tissue (**Fig 3a**). However, WT and *Gsdmd*<sup>-/-</sup> lung sections showed more severe  
183 tissue consolidation and cell infiltration throughout a greater portion of the lung than that seen in  
184 *Casp11*<sup>-/-</sup> mice. We thus quantified cell area versus airway space to determine cellularity scores  
185 indicative of pathology for tissue sections from individual mice<sup>21</sup>. We observed significantly  
186 decreased SARS-CoV-2-induced lung pathology in *Casp11*<sup>-/-</sup> mice compared to WT and *Gsdmd*<sup>-/-</sup>  
187 <sup>-/-</sup> mice (**Fig. 3a,b**), correlating with the preservation of *Casp11*<sup>-/-</sup> mice body weight and their faster  
188 recovery that (**Fig. 2a**).

189 Guided by our transcriptomic results indicating that a critical subset of inflammatory  
190 mediators are controlled by CASP11 (**Fig. 2f**), we measured levels of CXCL1, IL-1 $\beta$ , and IL-6 by  
191 ELISA in lung homogenates from infected animals at 2 and 4 days post-infection (**Fig. 3c,d**). IL-  
192 1 $\beta$  was lower in the lungs of both *Casp11*<sup>-/-</sup> and *Gsdmd*<sup>-/-</sup> mice at 2 days post-infection when  
193 compared to WT (**Fig. 3c**). Moreover, IL-1 $\beta$  staining in lung tissue sections revealed more IL-1 $\beta$   
194 in WT SARS-CoV-2 infected mice than *Casp11*<sup>-/-</sup> infected ones (**Supplementary Fig. 2**). On the  
195 other hand, the production of CXCL1 was dependent on *Casp11* at both time-points, and  
196 independent of *Gsdmd* (**Fig. 3c,d**). Average levels of IL-6 were partially decreased in *Casp11*<sup>-/-</sup>  
197 lungs with a statistically significant difference between WT and *Casp11*<sup>-/-</sup> lungs at day 4 (**Fig.**  
198 **3c,d**). These results corroborate and expand our day 2 transcriptomic analysis in which  
199 expression of *Il1b* and *Cxcl1* was decreased (**Fig. 2f**), and demonstrate that production of a critical  
200 subset of inflammatory mediators in the lung is dependent on CASP11 during SARS-CoV-2  
201 infection.

202 To determine the role of CASP11 in the response of lung macrophages to SARS-CoV-2,  
203 we purified mature primary macrophages from lungs of WT and *Casp11*<sup>-/-</sup> mice, and infected them  
204 with SARS-CoV-2 MA10. Culture supernatants and cellular RNA were collected and measured  
205 for IL-1 $\beta$ , IL-6 and CXCL1 protein and transcript levels, respectively. Compared with non-infected

206 cells, CXCL1 protein and RNA transcripts were detected at high levels upon infection of WT  
207 macrophages, but were poorly produced by *Casp11*<sup>-/-</sup> cells (**Fig. 3e,f**). Interestingly, IL-1β  
208 transcripts were also induced in a CASP11-dependent manner, but secreted protein was not  
209 detected in either group (**Fig. 3e,f**). Distinctly, protein and transcript levels of IL-6 did not  
210 significantly differ between WT and *Casp11*<sup>-/-</sup> cells (**Fig. 3e,f**). These results confirm our *in vivo*  
211 measurements and further demonstrate that CASP11 is an important cellular regulator of specific  
212 cytokines and chemokines, including CXCL1 and IL-1β, in response to SARS-CoV-2.

213

### 214 **CASP11 promotes lung neutrophil responses during SARS-CoV-2 infection**

215 To better understand the biological processes regulated by *Casp11*, we further analyzed the  
216 functional gene enrichment categories of the 236 genes most downregulated (LFC <-0.58; p-  
217 value <0.05) in *Casp11*<sup>-/-</sup> lungs. A striking enrichment of neutrophil-related gene signatures  
218 emerged that included neutrophil-specific markers (e.g., *Cd177* and *Cxcr2*), neutrophil  
219 degranulation genes (e.g., *Pglr1*, *Ckap4*, *Adam8*, and *Plac8*), and neutrophil complement  
220 receptors (*Itgam* and *Itgax*), among others (**Fig. 3g, Supplementary Fig. 1d**). Additionally, genes  
221 associated with the response to tissue damage from neutrophils (*Slpi* and *Lair1*) were also  
222 decreased in the absence of *Casp11* relative to WT lungs (**Fig. 3g**). These results are consistent  
223 with decreased gene expression for the neutrophil chemoattractant CXCL1 (**Fig. 3c,d**), as well  
224 as with previous reports of neutrophil regulation by CASP11 through effects on actin<sup>9,19</sup>.

225 Notably, expression of these neutrophil signature genes in *Gsdmd*<sup>-/-</sup> lungs was less  
226 affected than in *Casp11*<sup>-/-</sup> lungs (**Fig. 3g**), though other genes that are downregulated in the  
227 absence of *Gsdmd* were weakly associated with dysregulation of other immune pathways  
228 (**Supplementary Fig. 1e**). Conversely, analysis of genes upregulated in the absence of *Casp11*  
229 revealed a putative association with muscle-specific pathways (**Supplementary Fig. 1f**), while  
230 genes most upregulated in *Gsdmd*<sup>-/-</sup> lungs were not enriched for any specific functional pathways.  
231 Overall, these analyses most prominently demonstrate that CASP11 is required for robust  
232 production of specific inflammatory mediators as well as neutrophil recruitment and functions in  
233 the lung during SARS-CoV-2 infection.

234 To further examine the role of neutrophils in SARS-CoV-2 infection, lung sections from  
235 WT, *Casp11*<sup>-/-</sup> and *Gsdmd*<sup>-/-</sup> were stained for the neutrophil marker Ly6G (**Fig. 3h**). Quantification  
236 of Ly6G positive cells demonstrated fewer neutrophils in *Casp11*<sup>-/-</sup> and *Gsdmd*<sup>-/-</sup> lung sections  
237 when compared to WT, with a statistically significant difference seen when comparing WT and  
238 *Casp11*<sup>-/-</sup>, but not between *Casp11*<sup>-/-</sup> and *Gsdmd*<sup>-/-</sup> mice (**Fig. 3i**). These findings were  
239 corroborated by flow cytometric analysis quantifying the percentage of Ly6G<sup>high</sup> neutrophils

240 among the CD45<sup>+</sup> immune cells in lung single cell suspensions from SAR-CoV2-infected WT,  
241 *Casp11*<sup>-/-</sup> and *GsdmD*<sup>-/-</sup> mice (**Fig. 3j,k**).

242 One of the main neutrophil-mediated functions is formation of Neutrophil extracellular  
243 traps (NETs) which are concentrated chromatin released to immobilize pathogens, and can trigger  
244 immunothrombosis especially during SARS-CoV-2 infection through platelet-neutrophil  
245 interactions<sup>22</sup>. To determine if CASP11 and GSDMD modulate neutrophil functions during SARS-  
246 CoV-2 infection, WT, *Casp11*<sup>-/-</sup> and *Gsdmd*<sup>-/-</sup> neutrophils were treated with PMA (**Fig. 4a**), or  
247 culture supernatants of WT epithelial cells infected with SARS-CoV-2 (**Supplementary Fig. 3**).  
248 Notably, *Casp11*<sup>-/-</sup> neutrophils failed to form NETs in response to all conditions. In contrast,  
249 *Gsdmd*<sup>-/-</sup> and WT neutrophils formed NETs in response to all conditions (**Fig. 4a, Supplementary**  
250 **Fig. 3**). Together, our data demonstrate that lungs of SARS-CoV-2-infected *Casp11*<sup>-/-</sup> mice  
251 contain fewer neutrophils than infected WT lungs, and additionally, that *Casp11*<sup>-/-</sup> neutrophils  
252 largely fail to activate and undergo NETosis.

253

#### 254 **The lack of CASP11 reduces von Willebrand factor levels and increases vascular** 255 **integrity in response to SARS-CoV-2**

256 SARS-CoV-2 infection is accompanied by long-term sequela mediated in part by vascular  
257 damage and thrombosis<sup>23</sup>. Given that we noted decreased neutrophil gene signatures in *Casp11*<sup>-/-</sup>  
258 lungs upon infection, and since tissue infiltration by neutrophils can activate blood clotting  
259 cascades and thrombosis<sup>24,25</sup>, we examined whether the production of von Willebrand factor  
260 (VWF), which is essential to thrombus initiation and stabilization, is regulated by CASP11. Using  
261 RNAscope in situ hybridization (ISH) technology, we found significantly more blood vessels  
262 expressing VWF mRNA in the lung vascular architecture of SARS-CoV-2 infected WT mice when  
263 compared to *Casp11*<sup>-/-</sup> lungs at day 4 post-infection (**Fig. 4b, Supplementary Fig. 4**). Immunoblot  
264 analysis of lung homogenates confirmed that VWF was significantly lower in lungs of *Casp11*<sup>-/-</sup>  
265 mice when compared to WT lungs (**Fig. 4c,d**). Notably, lung sections from SARS-CoV-2-infected  
266 *Gsdmd*<sup>-/-</sup> showed more staining for VWF than *Casp11*<sup>-/-</sup> mice (**Fig. 4b**). Therefore, CASP11 is  
267 required for the accumulation of VWF in the lungs during SARS-CoV-2 infection. To determine  
268 the source of VWF, lung sections from *Casp11*<sup>-/-</sup> and *Gsdmd*<sup>-/-</sup> mice were processed for the  
269 simultaneous detection of endothelial marker VEGF receptor 1 (FLT1) and VWF mRNA<sup>26</sup>. We  
270 found that VWF RNA colocalized with FLT1, which was also upregulated in WT and *Gsdmd*<sup>-/-</sup> but  
271 not *Casp11*<sup>-/-</sup> lung sections (**Fig. 4f, Supplementary Fig. 5**). Furthermore, we examined the  
272 expression of Kruppel-Like Factor 2 (KLF2) in WT and *Casp11*<sup>-/-</sup> SARS-CoV-2-infected lungs.  
273 KLF2 is an endothelial protective transcription factor that exerts anti-inflammatory and anti-



274 thrombotic functions in the vascular endothelial cell and maintains the integrity of the endothelial  
275 vasculature. We found that KLF2 expression is significantly reduced after SARS-CoV-2-infection  
276 in WT lungs, but largely preserved in *Casp11*<sup>-/-</sup> infected lungs (**Fig. 4e**). Moreover, we examined  
277 the vascular architecture in the cleared lungs of SARS-CoV-2 infected mice by using fluorophore  
278 conjugated albumin and tissue clearing (**Supplementary Fig 6**). The vascular tracing revealed  
279 distinctive vascular features in WT SARS-CoV-2-infected lungs with pronounced vascular  
280 thickening and angiogenesis/neovascularization (**Fig. 4g**). In stark contrast, *Casp11*<sup>-/-</sup> infected  
281 lung vasculature did not show these abnormalities, confirming less endothelial  
282 damage/dysfunction (**Fig. 4g**). Taken together, we conclude that CASP11 contributes to  
283 endothelial injury and instigation of the coagulation cascade during SARS-CoV-2 infection.

284

285

## 286 Discussion

287 The medical and research communities have met challenges in identifying specific  
288 inflammatory mediators that can be targeted to ameliorate disease without impairing beneficial  
289 aspects of the immune response, such as viral clearance. A major impediment to mechanistic  
290 research in this regard has been the difficulty in infecting mouse models with SARS-CoV-2. Here  
291 we utilized the mouse-adapted SARS-CoV-2 (strain MA10)<sup>15</sup> that was plaque purified, grown in  
292 Vero-TMPRSS2 cells, and sequenced to ensure that it lacks the attenuating tissue culture  
293 adaptations present in stocks of the virus grown in standard Vero cells, the most commonly used  
294 cell line for SARS-CoV-2 propagation<sup>27</sup>. Our extensive purification regimen allowed us to achieve  
295 measurable pathogenicity in C57BL/6 mice and to infect gene knockout (KO) animals for  
296 mechanistic research *in vivo*. This manuscript thus represents one of the first *in vivo* studies  
297 performed with SARS-CoV-2 in specific KO animals.

298 The active inflammasome complex has been implicated in many disease conditions and  
299 infections, including SARS-CoV-2<sup>7,13</sup>. Cell culture experiments identified a minor role for the  
300 canonical inflammasome member caspase-1 (CASP1) in SARS-CoV-2 infection<sup>13</sup>. On the other  
301 hand, CASP11, a member of the non-canonical inflammasome, has not been previously  
302 investigated in this context *in vitro* or *in vivo*. CASP11 is not expressed by resting cells, yet it is  
303 induced by bacterial infection and several cytokines<sup>19,28,29</sup>. We mined available clinical data and  
304 found that the expression of human CASP4 in COVID-19 testing swab material correlates with  
305 the severity of SARS-CoV-2 infection. Additionally, we found that the expression of CASP4 is  
306 elevated in lung sections of SARS-CoV-2 patients. Similarly, mouse CASP11 is upregulated in  
307 the lungs of WT mice in response to SARS-CoV-2. We previously reported that CASP11 restricts

308 *Legionella pneumophila* and *Burkholderia cenocepacia* infections by regulating actin dynamics<sup>9</sup>.  
309 CASP11 recognizes bacterial lipopolysaccharide (LPS) in the cytosol leading to downstream  
310 activation of CASP1 and IL-1 $\beta$ <sup>30</sup>. However, the role of CASP11 is not restricted to Gram-negative  
311 bacteria that produce LPS<sup>9</sup>, since we found that CASP11 is exploited by the Gram-positive  
312 bacteria methicillin-resistant *Staphylococcus aureus* (MRSA), to survive in macrophages<sup>18</sup>. In  
313 these cases, CASP11 regulates the functions of actin machinery to affect vesicular trafficking and  
314 cell migration. While it is possible that reduced neutrophil infiltration in SARS-CoV-2-infected  
315 *Casp11*<sup>-/-</sup> lungs is due to reduced cytokine and chemokine levels in the lungs, we have also  
316 previously shown that even with exogenous addition of chemoattractants, *Casp11*<sup>-/-</sup> immune cells,  
317 particularly neutrophils, fail to travel to the inflammation site due to an inherent defect in cell  
318 movement<sup>19</sup>. Our lung histology and flow cytometry data show that neutrophil reduction in *Casp11*<sup>-/-</sup>  
319 <sup>-/-</sup> and *Gsdmd*<sup>-/-</sup> mice is comparable, yet the pathology in these animals is different. Our  
320 transcriptional profiling revealed a defect in cytokine responses, cellular recruitment, and immune  
321 activation in the absence of CASP11 demonstrating that *Casp11*<sup>-/-</sup> neutrophils may be non-  
322 functional when compared to WT and *Gsdmd*<sup>-/-</sup> neutrophils, a notion that is supported by the lack  
323 of NETosis in *Casp11*<sup>-/-</sup> neutrophils. On the other hand, GSDMD, which is considered the best  
324 characterized effector of CASP11 and CASP4<sup>12</sup>, did not contribute to the lung pathology of SARS-  
325 CoV-2-infected mice explaining why clinical trials using GSDMD inhibitors were not successful<sup>13</sup>.  
326 Hence, our data suggest that CASP11 mediates many functions that are not executed by  
327 GSDMD.

328 The lungs of human patients infected with SARS-CoV-2 show diffuse immune cell  
329 infiltration, alveolar damage, alveolar edema and proteinaceous exudates and destruction of  
330 endothelial cells, indicative of acute respiratory distress syndrome (ARDS)<sup>1,2</sup>. Similar findings are  
331 detected in WT and *Gsdmd*<sup>-/-</sup> mice while lung morphology appear healthier in *Casp11*<sup>-/-</sup> mice after  
332 SARS-CoV-2 infection. In addition, there is less weight loss, with fast recovery to normal weight  
333 in *Casp-11*<sup>-/-</sup> mice, when compared with WT and *Gsdmd*<sup>-/-</sup> mice, which are slower to recover.  
334 Importantly, the differences in disease severity are not due to changes in viral burden among  
335 different genotypes. This is consistent with a lack of changes in global ISG expression in WT  
336 versus *Casp11*<sup>-/-</sup> or *Gsdmd*<sup>-/-</sup> lungs, which are genes implicated in viral resistance and clearance.  
337 Instead, we observed reduced inflammation and lung pathology dependent on CASP11  
338 irrespective of viral loads. In *Casp11*<sup>-/-</sup>, but not *Gsdmd*<sup>-/-</sup> SARS-CoV-2-infected mice, cytokines  
339 including *Cxcl1*, *Cxcl2*, *Cxcl14*, which are involved in neutrophil and monocyte recruitment<sup>31</sup>, were  
340 significantly down-regulated. However, there was no significant difference in expression of IL-1 $\beta$   
341 between *Casp11*<sup>-/-</sup> and *Gsdmd*<sup>-/-</sup> mice. *In vitro*, IL-1 $\beta$  was barely detectable in the supernatants of

342 macrophages infected with SARS-CoV-2. This is explained by a recent publication demonstrating  
343 that SARS-CoV-2 nucleocapsid inhibits the cleavage of GSDMD in infected cells and hence  
344 prevents the release of IL-1 $\beta$ <sup>32</sup>. In addition, our data demonstrate that IL-6 is elevated in infected  
345 lungs in a CASP11-dependent manner. IL-6 was identified during COVID-19 pandemic as being  
346 a highly upregulated mediator of disease severity in ill patients. Moreover, high levels of IL-6 can  
347 also activate the coagulation system and increase vascular permeability<sup>3</sup>.

348 Post-mortem studies have highlighted disseminated micro-thrombi which together with  
349 increased mortality, morbidity and long-term sequel from SARS-CoV-2 infection, are considered  
350 hallmarks of severe COVID-19<sup>33,34</sup>. Currently, the administration of an anticoagulant such as  
351 heparin for all hospitalized COVID-19 patients is associated with lower mortality rates and better  
352 prognosis<sup>3</sup>. Typically, endothelial activation and damage leads to increased VWF production and  
353 this activates the coagulation cascade, along with extensive NETosis elicited by neutrophils  
354 leading to prothrombotic events<sup>23,35</sup>. Importantly, we found here that lungs from *Casp11*<sup>-/-</sup> mice  
355 accumulate significantly less VWF in response to SARS-CoV-2 infection, which is largely confined  
356 to what appears to be lining of blood vessels. In contrast, the distribution of VWF in WT lungs was  
357 intense and diffuse suggesting the presence of vascular damage. Notably, lung sections from  
358 *Gsdmd*<sup>-/-</sup> expressed more VWF than those from *Casp11*<sup>-/-</sup> mice. To further evaluate endothelial  
359 damage, we determined the expression of the transcription factor KLF2. Recent reports have  
360 linked the vascular injury that is associated with SARS-CoV-2 to the reduction in the expression  
361 of KLF2 in lung endothelial cells<sup>36</sup>. We found that KLF2 levels are largely preserved in the *Casp11*<sup>-/-</sup>  
362 lungs but are significantly reduced in WT and *Gsdmd*<sup>-/-</sup> lungs. Moreover, the vascular  
363 abnormalities we detected on lung vascular tracing indicate severe endothelial damage and  
364 endothelialitis in WT SARS-CoV-2-infected lungs. These vascular features resemble the  
365 intussusceptive angiogenesis that has been described in SARS-CoV-2-infected human lungs<sup>37,38</sup>.  
366 Importantly, the inhibition of angiogenesis through targeting vascular endothelial growth factor  
367 (VEGF) has been proven beneficial in patients with severe SARS-CoV-2<sup>39</sup>. Notably, we have  
368 found less expression of VEGF receptor 1 (FLT1) with less angiogenesis and neovascularization  
369 in the infected *Casp11*<sup>-/-</sup> lungs compared to WT and *Gsdmd*<sup>-/-</sup> lungs. Our data demonstrate a  
370 previously unrecognized function for CASP11 which is the promotion of coagulation pathways  
371 and endothelial dysfunction that lead to thrombotic events.

372 Together, our findings suggest that targeting the CASP11 homologue, human CASP4,  
373 during COVID-19 will prevent severe pneumonia, inflammation, tissue damage as well as  
374 thrombosis and accompanying repercussions such as low oxygen, lung failure, need for  
375 ventilators and perhaps long-term sequela. These advantageous effects will be achieved without

376 compromising viral clearance. It is also plausible that the level of expression of CASP4 could  
377 serve as a biomarker to identify patients who will succumb to severe Covid. Targeting CASP4  
378 alone can achieve benefits that will exceed and replace the administration of a large number of  
379 individual anti-inflammatory agents and anti-thrombotics given to SARS-CoV-2 patients. Further  
380 research is needed to develop therapeutics in this regard.

381

## 382 **Materials and Methods**

### 383 **Biosafety**

384 All experiments with live SARS-CoV-2 were performed in the OSU BSL3 biocontainment facility.  
385 All procedures were approved by the OSU BSL3 Operations/Advisory Group, the OSU  
386 Institutional Biosafety Officer, and the OSU Institutional Biosafety Committee.

387

### 388 **Viruses and titers**

389 Mouse adapted SARS-CoV-2, variant strain MA10<sup>15</sup>, generated by the laboratory of Dr. Ralph  
390 Baric (University of North Carolina) was provided by BEI Resources (Cat # NR-55329). SARS-  
391 CoV-2 strain USA-WA1/2020 was also provided by BEI Resources (Cat # NR-52281). Viral stocks  
392 from BEI Resources were plaque purified on Vero E6 cells to identify plaques lacking mutations  
393 in the polybasic cleavage site of the Spike protein via sequencing. Non-mutated clones were  
394 propagated on Vero E6 cells stably expressing TMPRSS2 (provided by Dr. Shan-Lu Liu, The Ohio  
395 State University). Virus aliquots were flash frozen in liquid nitrogen and stored at -80 C. Virus  
396 stocks were sequenced to confirm a lack of tissue culture adaptation in the polybasic cleavage  
397 site. Virus stocks and tissue homogenates were titered on Vero E6 cells.

398

### 399 **Mice**

400 C57BL/6 wild-type (WT) mice were obtained from the Jackson Laboratory (Bar Harbor, ME, USA).  
401 *Casp11*<sup>-/-</sup> mice were generously given by Dr. Yuan at Harvard Medical School, Boston, MA,  
402 USA<sup>106</sup>. *Gsdmd*<sup>-/-</sup> mice were a gift from Dr. Thirumala-Devi Kanneganti at St. Jude Children's  
403 Research Hospital, Memphis, TN, USA. K18-hACE2 mice<sup>40</sup> were purchased from Jackson  
404 Laboratories. All infections were performed intranasally on anesthetized mice with viruses diluted  
405 in sterile saline. All mice were housed in a pathogen-free facility, and experiments were conducted  
406 with approval from the Animal Care and Use Committee at the Ohio State University (Columbus,  
407 OH, USA) which is accredited by AAALAC International according to guidelines of the Public  
408 Health Service as issued in the Guide for the Care and Use of Laboratory Animals.

409

## 410 **Derivation of single cell suspension and primary lung macrophages**

411 Lungs were perfused with cold PBS to remove circulating intravascular WBCs. Lungs were  
412 dissected into single lobes before being dissociated into single cell suspension using gentleMACS  
413 octo-dissociator and Miltenyi lung dissociation kit (Miltenyi Biotec, 130-095-927). Red blood cells  
414 (RBCs) were lysed by incubating cells in 2 ml ACK buffer for 5 min at room temperature. After  
415 RBCs lysis, cells were washed in DPBS containing 1% BSA. The single cell suspension was  
416 centrifuged, and the cell pellets were washed twice with PBS. Cell pellets were further suspended  
417 in 0.5 ml of PBS 1%BSA. This was followed by CD11b magnetic bead (Miltenyi Biotec, 130-049-  
418 601) isolation technique to positively select for macrophage expressing the pan-  
419 macrophage/monocyte CD11b marker.

420

## 421 **Flow cytometry**

422 Single cell suspension from the previous step was stained with fluorophore conjugated  
423 antibodies for fluorometric analysis as described before <sup>41</sup>.

424

## 425 **Murine tracheobronchial epithelial 3D cultures**

426 Murine trachea and bronchioles were dissected from two mice each of C57Bl/6 WT, *Casp11<sup>-/-</sup>*  
427 and *Gsdmd<sup>-/-</sup>*. Isolation of tracheobronchial epithelial cells was as follows. Tissues were washed,  
428 and tracheas were incubated overnight in Ham's F12, 1% penicillin/streptomycin, 1%  
429 amphotericin B (Fisher Scientific, #15290018) and Pronase from *Streptomyces griseus* (Sigma  
430 Aldrich, #10165921001) solution. Digestion of trachea and bronchioles were neutralized with 10%  
431 fetal bovine solution (FBS; Life Technologies, #10438026) and tracheal airway cells were gently  
432 scraped. Cells were washed three times in Ham's F12, 10% FBS and 1% penicillin/streptomycin  
433 solution and further digested in DNase I solution (Sigma Aldrich, #DN25-10) in Ham's F12 with  
434 10mg/mL bovine serum albumin (Fisher Scientific, #BP9706). Airway cells were then washed with  
435 Murine Tracheobronchial Epithelial Cell (MTEC) base medium [1:1 Ham's F12: DMEM (Fisher  
436 Scientific, #11995065), plus 10% FBS, 1% penicillin/streptomycin, 50µg/mL gentamicin (Life  
437 Technologies, #15710064), and 0.03% w/v NaHCO<sub>3</sub>]. Cells were plated in a T25 flask (Fisher  
438 Scientific, #1012610) overnight in MTEC medium at 37°C, 5% CO<sub>2</sub>. The next day, medium was  
439 switched to 1:1 of MTEC and PneumaCult-Ex PLUS medium (StemCell Technologies, #05040)  
440 and fed every other day until expansion of cells to ~80% confluent. Epithelial cells were then  
441 trypsinized twice with TrypLE Express (ThermoFisher, #12605010) to remove residual fibroblast  
442 cells and seeded at a density of 50,000 cells per transwell in Corning 6.5mm 24-well transwells  
443 (Fisher Scientific, #07200154) in 1:1 MTEC:PneumaCult-Ex PLUS medium. Cells were fed for 4-

444 5 days until airlifted and continued to be grown at air-liquid interface (ALI) with PneumaCult ALI  
445 medium (StemCell Technologies, #05001) until fully differentiated (4 weeks)

446

#### 447 **Immunoblotting**

448 Protein extraction from lung tissue was performed using TRIzol reagent (Thermo Fisher Scientific,  
449 15596026) according to the manufacturer's instructions. Equal amounts of protein were separated  
450 by SDS-PAGE and transferred to a polyvinylidene fluoride (PVDF) membrane. Membranes were  
451 incubated overnight with antibodies against CASP11 (Cell Signaling Technology, 14340), VWF  
452 (Protein tech, 11778-1-AP), and  $\beta$ -Actin (Cell Signaling Technology, 3700). Corresponding  
453 secondary antibodies conjugated with horseradish peroxidase in combination with enhanced  
454 chemiluminescence reagent (Amersham, RPN2209,) were used to visualize protein bands.  
455 Densitometry analyses were performed by normalizing target protein bands to their respective  
456 loading control ( $\beta$ -Actin) using ImageJ software as previously described<sup>19,42</sup>.

457

#### 458 **ELISAs**

459 Cytokine/chemokine ELISAs were performed on lung homogenates or macrophage supernatants  
460 using R&D Systems Duoset ELISA kits (IL-6, DY406; IL-1b, DY401; CXCL1, DY453) according  
461 to the manufacturer's instructions.

462

#### 463 **Histology**

464 Lungs were removed from infected mice, and fixed in 10% formalin at room temperature. Sample  
465 preparation, processing, hematoxylin and eosin staining (H&E), and semi-quantitative slide  
466 evaluation using ordinal grading scales was performed as previously described<sup>59</sup>. Lungs used for  
467 immunofluorescence staining and RNAscope<sup>®</sup> ISH technique were embedded in OCT and flash  
468 frozen while lung tissue used for IHC was embedded in paraffin blocks.

469

#### 470 **Immunohistochemistry (IHC) and Immunofluorescence (IF) staining for mouse tissues**

471 Immunofluorescence (IF) staining of mouse lung sections has been performed as previously  
472 described<sup>42</sup>. Slides were washed 3 times for 15 min with PBS to remove residual OCT. The  
473 sections were then incubated in the blocking solution (PBS containing 10% donkey serum (cat  
474 no: S30-100ml, Millipore Sigma), 2% BSA (cat no: BP1600-100, Fisher Scientific) and 0.3% Triton  
475 X-100 (cat no: BP151-100, Fisher Scientific) for 2 h at room temperature. Sections were then  
476 transferred to blocking solution containing the primary antibody against IL1 $\beta$  (GeneTex,  
477 GTX74034), and incubated overnight at 4°C. After that, sections were washed with PBS 3X for

478 15 min each. Then, they were incubated with the blocking solution containing the secondary  
479 antibody, for 2 h at room temperature. DAPI (cat no: D1306, Fisher Scientific) was added to the  
480 staining solution in the last 15 min of incubation at a final concentration (5ug/ml). Finally, sections  
481 were washed with PBS 3X for 15 min. Antifade mounting media (cat no: P36934, Thermo Fisher  
482 Scientific) was added before cover-slipped. For IHC, Ly6G (Abcam, ab25377) and SARS-CoV-2  
483 nucleocapsid protein (GeneTex, GTX635686) primary antibodies were used. All the stainings  
484 were performed at Histowiz, Inc Brooklyn, using the Leica Bond RX automated stainer (Leica  
485 Microsystems). The slides were dewaxed using xylene and alcohol based dewaxing solutions.  
486 Epitope retrieval was performed by heat-induced epitope retrieval (HIER) of the formalin-fixed,  
487 paraffin-embedded tissue using citrate based pH 6 solution for 40 mins at 95 C. The tissues were  
488 first incubated with peroxide block buffer (Leica Microsystems), followed by incubation with the  
489 rabbit Caspase 4 antibody (Novus Bio NBP1-87681) at 1:700 dilution for 30mins, followed by DAB  
490 rabbit secondary reagents: polymer, DAB refine and hematoxylin (Leica Microsystems). The  
491 slides were dried, coverslipped and visualized using a Leica Aperio AT2 slide scanner (Leica  
492 Microsystems)."

493

#### 494 **RNAscope In situ hybridization (ISH)**

495 Lung tissue was fixed and embedded in OCT as described above. Sections of 15 microns  
496 thickness were mounted on Plus charged slides. ISH was performed using RNAscope Multiplex  
497 Fluorescent Reagent Kit v2 (Advanced Cell Diagnostics, Cat. No. 323100) as described before<sup>43</sup>.  
498 All incubations between 40 and 60° C were conducted using an ACD HybEZ II Hybridization  
499 System with an EZ-Batch Slide System (Advanced Cell Diagnostics; cat# 321710). Slides were  
500 washed in PBS twice to remove any residual OCT then baked at 60°C for 30 minutes. Baked  
501 slides were subsequently post fixed in cold 10% formalin for 15 minutes then washed and treated  
502 with Hydrogen Peroxide solution (10 min at RT; Advanced Cell Diagnostics, cat# 322335). After  
503 being rinsed twice with ddH<sub>2</sub>O, sections were incubated in RNAscope Target Retrieval Solution  
504 (98 C for 5 min; Advanced Cell Diagnostics, cat# 322001) and rinsed 3 times. Next, a hydrophobic  
505 barrier was created around the tissue using an ImmEdge Pen (Advanced Cell Diagnostics; cat#  
506 310018), and slides were incubated with RNAscope® Protease III (30 min at 40 C; Advanced Cell  
507 Diagnostics, cat# 322337), and subsequently incubated with RNAscope target probes VWF(cat#  
508 499111), FLT1(cat# 415541-C2), Casp4/Casp11 (cat# 589511) for 2 hours at 40°. Next, slides  
509 were washed twice with 1X Wash Buffer (Advanced Cell Diagnostics, cat# 310091; 2 min/rinse at  
510 RT) followed by sequential tissue application of the following: RNAscope Multiplex FL v2 Amp 1  
511 (Advanced Cell Diagnostics, cat# 323101), RNAscope Multiplex FL v2 Amp 2 (Advanced Cell

512 Diagnostics, cat# 323102), and RNAscope Multiplex FL v2 Amp 3 (Advanced Cell Diagnostics,  
513 cat# 323103). This was followed by application of RNAscope Multiplex FL v2 HRP C1or C2 (15  
514 min at 40 C; Advanced Cell Diagnostics, cat#323104). Finally, Opal dyes (Opal 520 and 570 were  
515 used, Fisher Scientific; cat# NC1601877 and cat#NC601878) was then applied, 520 (Fisher  
516 Scientific; cat#NC1601877) diluted in RNAscope TSA buffer (Advanced Cell Diagnostics, cat#  
517 322809) for 30 min at 40 C. HRP blocker was subsequently added to halt the reaction. Finally,  
518 slides were incubated with DAPI, coverslipped with ProLong Gold Antifade Mountant (Fisher  
519 Scientific, cat# P36930), and stored at 4 C until image acquisition.

520

### 521 **Confocal imaging and analysis**

522 Fluorescent images were captured on Olympus FV 3000 inverted microscope with a motorized  
523 stage. A 2x objective was used to create a map of the lung section in the X,Y dimension. This  
524 was followed by using 20x objective to create a stitched z stacked three dimensional panoramic  
525 view of the lung section. Images were taken by using the 488 nm, 543 nm, and 405 nm (for DAPI)  
526 lasers. Image reconstructions of z-stacks and intensity projection images (IPI) were generated in  
527 Imaris software (Bitplane, Inc.). *Flt1* mRNA expression was quantified using spot function in  
528 IMARIS. Number of cells was also quantified via the spot functions.

529

530

### 531 **Vasculature labeling with conjugated albumin**

532 The mouse vasculature was labeled as reported by Di Giovanna *et al.*<sup>44</sup>. Briefly, mice were  
533 transcardially perfused with 10% formalin in phosphate buffered saline (PBS). Mice were then  
534 perfused with 5ml of 0.05% albumin-tetramethylrhodamine isothiocyanate bovine (A2289, Sigma)  
535 in 2% gelatin from porcine skin (G1890, Sigma). At the time of injection, the temperature of the  
536 gel solution was kept at 45°C. After clamping the heart, mice were placed on ice to lower the body  
537 temperature and allow gel formation. Lungs were post-fixed in 10% formalin for 10 days. The  
538 unsectioned lungs were then cleared using the advanced CUBIC protocol<sup>45</sup> and imaged using a  
539 confocal microscope (C2, Nikon).

540

### 541 **NET Formation Assay**

542 Bone marrow was collected from WT, *Gsdmd*<sup>-/-</sup> or *Casp11*<sup>-/-</sup> mice, then neutrophils were  
543 negatively selected by using the EasySep™ mouse neutrophil enrichment kit (STEM cell  
544 technologies, #19762A), and 200,000 neutrophils/well were plated in 24-well plate on fibronectin  
545 coated glass coverslip. Polymorphonuclear neutrophils (PMNs) were stimulated for 4 h with 100



546 nM PMA (Sigma-Aldrich, #P8139-10MG) or conditioned media from SARS-CoV-2-infected  
547 epithelial cells. The cells were fixed with 4% paraformaldehyde, permeabilized with 0.2% of Triton  
548 X-100 for 10 minutes and blocked with 10% goat serum for 30 min at RT. For the visualization of  
549 Neutrophils Extracellular Traps (NETs), neutrophils were stained with rabbit anti-mouse Histone  
550 2b (Abcam, #ab1790), mouse anti-dsDNA (Abcam, #ab27156), goat anti-rabbit IgG Alexa Fluor  
551 555 (Thermofisher, #A32732), goat anti-mouse IgG Alexa Fluor 488 (Abcam, #ab150113) and  
552 wheat germ agglutinin (WGA) Alexa Fluor 350 (Thermofisher, #W11263). The coverslips were  
553 mounted with Fluoroshield Mounting Medium (Abcam, #ab104135). The cells were visualized by  
554 confocal microscopy (Zeiss 800 Confocal microscope).

555

### 556 **RNAseq and data analysis**

557 Total RNA was extracted from day 2 SARS-CoV-2 WT, *Casp11<sup>-/-</sup>*, and *Gsdmd<sup>-/-</sup>* infected  
558 lungs by TRIzol reagent (Thermo Fisher Scientific, 15596026) according to the manufacturer's  
559 instructions. RNA cleaning and concentration was done using Zymo Research, RNA Clean &  
560 Concentrator™-5 kit (cat# R1015) following the manufacturer's protocol. Fluorometric  
561 quantification of RNA and RNA integrity analysis was carried out using RNA Biochip and Qubit  
562 RNA Fluorescence Dye (Invitrogen). cDNA libraries were generated using NEBNext® Ultra™ II  
563 Directional (stranded) RNA Library Prep Kit for Illumina (NEB #E7760L). Ribosomal RNA was  
564 removed using NEBNext rRNA Depletion Kit (human, mouse, rat) (E #E6310X). Libraries were  
565 indexed using NEBNext Multiplex Oligos for Illumina Unique Dual Index Primer Pairs (NEB  
566 #644OS/L). Library prep generated cDNA was quantified and analyzed using Agilent DNA chip  
567 and Qubit DNA dye. Ribo-depleted total transcriptome libraries were sequenced on an Illumina  
568 NovaSeq SP flow cell (paired-end 150bp format; 35-40 million clusters, equivalent to 70-80 million  
569 reads. Library preparation, QC, and sequencing was carried out at Nationwide Children's Hospital  
570 genomic core.

571 Sequencing data processing and analysis was performed by the Bioinformatics Shared  
572 Resource Group (BISR) at the Ohio State University using previously published pipelines <sup>46</sup>.  
573 Briefly, raw RNAseq data (fastq) were aligned to mouse reference genome (GRCh38) using  
574 hisat2 (v2.1.0) <sup>47</sup> and converted to counts using the 'subread' package (v1.5.1) <sup>48</sup> in R. In the  
575 case of multimapped reads, the primary alignment was counted. Low expressed counts were  
576 excluded if more than half of the samples did not meet the inclusion criteria (2 CPM). Data were  
577 normalized using 'voom' and statistical analysis for differential expression was performed with  
578 'limma' <sup>49</sup>. For data visualization, DESeq2 rlog transformation was used for principal component  
579 analysis (PCA). Volcano plots were generated with 'EnhancedVolcano' and heatmaps were

580 generated 'ComplexHeatmap' using R. Functional enrichment performed with Ingenuity Pathway  
581 Analysis (Qiagen) to enrich for IPA Canonical Pathways, 'clusterProfiler' to generate enrichment  
582 maps <sup>46</sup>, and EnrichR <sup>50</sup>.

583

#### 584 **Statistical analysis**

585 Data were analyzed using GraphPad Prism 8.3.0. All figures display mean and standard deviation  
586 (SD) or standard error of the mean (SEM) from independent experiments as indicated in the figure  
587 legends. Comparisons between groups were conducted with either upaired t-test or ANOVA  
588 followed by Tukey's multiple comparisons test. Adjusted P<0.05 was considered statistically  
589 significant.

590

#### 591 **Data availability**

592 Data shared through Gene Expression Omnibus with accession number GSE184678.

593

#### 594 **Author Contributions**

595 Conceptualization, A.O.A., J.S.Y.; Experiments and data acquisition, M.E., A.Z., A.D.K., S.E.,  
596 A.B., E.A., E.K., C.C., K.D., O.W., J.K., A.E., P.D. E.K, E.A.H., E.C.-B., P.B.; Generation of  
597 critical reagents and patient samples, M.K.C, M.L., J.L., M.P., J.Z., J.Q., A.T.; Data Analysis,  
598 M.E., A.Z., M.P., A.W., A.F., A.O.A, J.S.Y. ; Writing – Original draft, A.O.A, J.S.Y., A.F.; Writing  
599 – Review and editing, all authors.; Project Administration, A.O.A., J.S.Y.; Supervision, A.O.A.,  
600 J.S.Y, E.C.-B., P.B.; Funding Acquisition, A.O.A and J.S.Y.

601

602

#### 603 **Acknowledgments**

604 Studies in the Amer laboratory are supported by AI24121, HL127651, NIH Covid supplement and  
605 a Pilot Grant from the OSU Department of Microbial Infection and Immunity. A.B. is supported in  
606 part by the C3 training grant. Studies in the Yount laboratory are supported by NIAID grants  
607 AI130110, AI151230, AI142256, AI146690, and AI151230, as well as by the American Lung  
608 Association's COVID-19 and Emerging Respiratory Viruses Research Award. Ashley Zani is  
609 supported by an NSF-GRFP fellowship. The authors declare that they have no conflict of interests.

610

611

612

613

614 **References**

- 615 1. Adil, M.T., *et al.* SARS-CoV-2 and the pandemic of COVID-19. *Postgrad Med J* **97**, 110-  
616 116 (2021).
- 617 2. Das, A., Roy, S., Swarnakar, S. & Chatterjee, N. Understanding the immunological  
618 aspects of SARS-CoV-2 causing COVID-19 pandemic: A therapeutic approach. *Clin*  
619 *Immunol*, 108804 (2021).
- 620 3. Lavillegrand, J.R., *et al.* Elevated plasma IL-6 and CRP levels are associated with  
621 adverse clinical outcomes and death in critically ill SARS-CoV-2 patients: inflammatory  
622 response of SARS-CoV-2 patients. *Ann Intensive Care* **11**, 9 (2021).
- 623 4. Rodriguez, C., *et al.* Pulmonary Endothelial Dysfunction and Thrombotic Complications  
624 in Patients with COVID-19. *Am J Respir Cell Mol Biol* **64**, 407-415 (2021).
- 625 5. Ladikou, E.E., *et al.* Von Willebrand factor (vWF): marker of endothelial damage and  
626 thrombotic risk in COVID-19? *Clin Med (Lond)* **20**, e178-e182 (2020).
- 627 6. Zakeri, A., Jadhav, A.P., Sullenger, B.A. & Nimjee, S.M. Ischemic stroke in COVID-19-  
628 positive patients: an overview of SARS-CoV-2 and thrombotic mechanisms for the  
629 neurointerventionalist. *J Neurointerv Surg* **13**, 202-206 (2021).
- 630 7. Rodrigues, T.S., *et al.* Inflammasomes are activated in response to SARS-CoV-2  
631 infection and are associated with COVID-19 severity in patients. *J Exp Med* **218**(2021).
- 632 8. Melo Silva Junior, M.L., Souza, L.M.A., Dutra, R., Valente, R.G.M. & Melo, T.S. Review  
633 on therapeutic targets for COVID-19: insights from cytokine storm. *Postgrad Med J* **97**,  
634 391-398 (2021).
- 635 9. Akhter, A., *et al.* Caspase-11 promotes the fusion of phagosomes harboring pathogenic  
636 bacteria with lysosomes by modulating actin polymerization. *Immunity* **37**, 35-47 (2012).
- 637 10. Krause, K., *et al.* CASP4/caspase-11 promotes autophagosome formation in response  
638 to bacterial infection. *Autophagy* **14**, 1928-1942 (2018).
- 639 11. Broz, P., Pelegrin, P. & Shao, F. The gasdermins, a protein family executing cell death  
640 and inflammation. *Nat Rev Immunol* (2019).
- 641 12. Kayagaki, N., *et al.* Caspase-11 cleaves gasdermin D for non-canonical inflammasome  
642 signalling. *Nature* **526**, 666-671 (2015).
- 643 13. Junqueira, C., *et al.* SARS-CoV-2 infects blood monocytes to activate NLRP3 and AIM2  
644 inflammasomes, pyroptosis and cytokine release. *medRxiv* (2021).
- 645 14. Oh, C., Verma, A. & Aachoui, Y. Caspase-11 Non-canonical Inflammasomes in the  
646 Lung. *Front Immunol* **11**, 1895 (2020).
- 647 15. Leist, S.R., *et al.* A Mouse-Adapted SARS-CoV-2 Induces Acute Lung Injury and  
648 Mortality in Standard Laboratory Mice. *Cell* **183**, 1070-1085 e1012 (2020).
- 649 16. Bao, L., *et al.* The pathogenicity of SARS-CoV-2 in hACE2 transgenic mice. *Nature* **583**,  
650 830-833 (2020).
- 651 17. Moreau, G.B., *et al.* Evaluation of K18-hACE2 Mice as a Model of SARS-CoV-2  
652 Infection. *Am J Trop Med Hyg* **103**, 1215-1219 (2020).
- 653 18. Krause, K., *et al.* Caspase-11 counteracts mitochondrial ROS-mediated clearance of  
654 *Staphylococcus aureus* in macrophages. *EMBO Rep* **20**, e48109 (2019).
- 655 19. Kyle Caution, *et al.* Caspase-11 mediates migration of neutrophils and necroptosis  
656 during acute gouty arthritis. . *Frontiers in Immunology* **Accepted**(2019).

- 657 20. Major, J., *et al.* Type I and III interferons disrupt lung epithelial repair during recovery  
658 from viral infection. *Science* **369**, 712-717 (2020).
- 659 21. Ruifrok, A.C. & Johnston, D.A. Quantification of histochemical staining by color  
660 deconvolution. *Anal Quant Cytol Histol* **23**, 291-299 (2001).
- 661 22. Middleton, E.A., *et al.* Neutrophil extracellular traps contribute to immunothrombosis in  
662 COVID-19 acute respiratory distress syndrome. *Blood* **136**, 1169-1179 (2020).
- 663 23. Helms, J., *et al.* High risk of thrombosis in patients with severe SARS-CoV-2 infection: a  
664 multicenter prospective cohort study. *Intensive Care Med* **46**, 1089-1098 (2020).
- 665 24. Cornelissen, A., *et al.* Effects of simulated COVID-19 cytokine storm on stent  
666 thrombogenicity. *Cardiovasc Revasc Med* (2021).
- 667 25. Radermecker, C., *et al.* Neutrophil extracellular traps infiltrate the lung airway, interstitial,  
668 and vascular compartments in severe COVID-19. *J Exp Med* **217**(2020).
- 669 26. Giardini, V., *et al.* Increased sFLT-1/PIGF ratio in COVID-19: A novel link to angiotensin  
670 II-mediated endothelial dysfunction. *Am J Hematol* **95**, E188-E191 (2020).
- 671 27. Sasaki, M., *et al.* SARS-CoV-2 variants with mutations at the S1/S2 cleavage site are  
672 generated in vitro during propagation in TMPRSS2-deficient cells. *PLoS Pathog* **17**,  
673 e1009233 (2021).
- 674 28. Vanaja, S.K., *et al.* Bacterial Outer Membrane Vesicles Mediate Cytosolic Localization of  
675 LPS and Caspase-11 Activation. *Cell* **165**, 1106-1119 (2016).
- 676 29. Kayagaki, N., *et al.* Non-canonical inflammasome activation targets caspase-11. *Nature*  
677 **479**, 117-121 (2011).
- 678 30. Yi, Y.S. Caspase-11 non-canonical inflammasome: a critical sensor of intracellular  
679 lipopolysaccharide in macrophage-mediated inflammatory responses. *Immunology* **152**,  
680 207-217 (2017).
- 681 31. Coperchini, F., Chiovato, L., Croce, L., Magri, F. & Rotondi, M. The cytokine storm in  
682 COVID-19: An overview of the involvement of the chemokine/chemokine-receptor  
683 system. *Cytokine Growth Factor Rev* **53**, 25-32 (2020).
- 684 32. Ma, J., *et al.* SARS-CoV-2 nucleocapsid suppresses host pyroptosis by blocking  
685 Gasdermin D cleavage. *EMBO J*, e108249 (2021).
- 686 33. Badraoui, R., Alrashedi, M.M., El-May, M.V. & Bardakci, F. Acute respiratory distress  
687 syndrome: a life threatening associated complication of SARS-CoV-2 infection inducing  
688 COVID-19. *J Biomol Struct Dyn*, 1-10 (2020).
- 689 34. Liu, F., *et al.* SARS-CoV-2 Infects Endothelial Cells In Vivo and In Vitro. *Front Cell Infect*  
690 *Microbiol* **11**, 701278 (2021).
- 691 35. Francischetti, I.M.B., *et al.* Upregulation of pulmonary tissue factor, loss of  
692 thrombomodulin and immunothrombosis in SARS-CoV-2 infection. *EClinicalMedicine* **39**,  
693 101069 (2021).
- 694 36. Lee, T.H., *et al.* SARS-CoV-2 infection reduces Kruppel-Like Factor 2 in human lung  
695 autopsy. *bioRxiv* (2021).
- 696 37. Ackermann, M., *et al.* Pulmonary Vascular Endothelialitis, Thrombosis, and  
697 Angiogenesis in Covid-19. *N Engl J Med* **383**, 120-128 (2020).
- 698 38. Varga, Z., *et al.* Endothelial cell infection and endotheliitis in COVID-19. *Lancet* **395**,  
699 1417-1418 (2020).

- 700 39. Pang, J., *et al.* Efficacy and tolerability of bevacizumab in patients with severe Covid-19.  
701 *Nat Commun* **12**, 814 (2021).
- 702 40. McCray, P.B., Jr., *et al.* Lethal infection of K18-hACE2 mice infected with severe acute  
703 respiratory syndrome coronavirus. *J Virol* **81**, 813-821 (2007).
- 704 41. Yu, Y.R., *et al.* A Protocol for the Comprehensive Flow Cytometric Analysis of Immune  
705 Cells in Normal and Inflamed Murine Non-Lymphoid Tissues. *PLoS One* **11**, e0150606  
706 (2016).
- 707 42. Estfanous, S., *et al.* Elevated Expression of MiR-17 in Microglia of Alzheimer's Disease  
708 Patients Abrogates Autophagy-Mediated Amyloid-beta Degradation. *Front Immunol* **12**,  
709 705581 (2021).
- 710 43. Merkley, C.M., Shuping, S.L., Sommer, J.R. & Nestor, C.C. Evidence That Agouti-  
711 Related Peptide May Directly Regulate Kisspeptin Neurons in Male Sheep. *Metabolites*  
712 **11**(2021).
- 713 44. Di Giovanna, A.P., *et al.* Whole-Brain Vasculature Reconstruction at the Single Capillary  
714 Level. *Sci Rep* **8**, 12573 (2018).
- 715 45. Susaki, E.A., *et al.* Advanced CUBIC protocols for whole-brain and whole-body clearing  
716 and imaging. *Nat Protoc* **10**, 1709-1727 (2015).
- 717 46. Gadepalli, V.S., Ozer, H.G., Yilmaz, A.S., Pietrzak, M. & Webb, A. BISR-RNAseq: an  
718 efficient and scalable RNAseq analysis workflow with interactive report generation. *BMC*  
719 *Bioinformatics* **20**, 670 (2019).
- 720 47. Kim, D., Langmead, B. & Salzberg, S.L. HISAT: a fast spliced aligner with low memory  
721 requirements. *Nat Methods* **12**, 357-360 (2015).
- 722 48. Liao, Y., Smyth, G.K. & Shi, W. featureCounts: an efficient general purpose program for  
723 assigning sequence reads to genomic features. *Bioinformatics* **30**, 923-930 (2014).
- 724 49. Ritchie, M.E., *et al.* limma powers differential expression analyses for RNA-sequencing  
725 and microarray studies. *Nucleic Acids Res* **43**, e47 (2015).
- 726 50. Kuleshov, M.V., *et al.* Enrichr: a comprehensive gene set enrichment analysis web  
727 server 2016 update. *Nucleic Acids Res* **44**, W90-97 (2016).

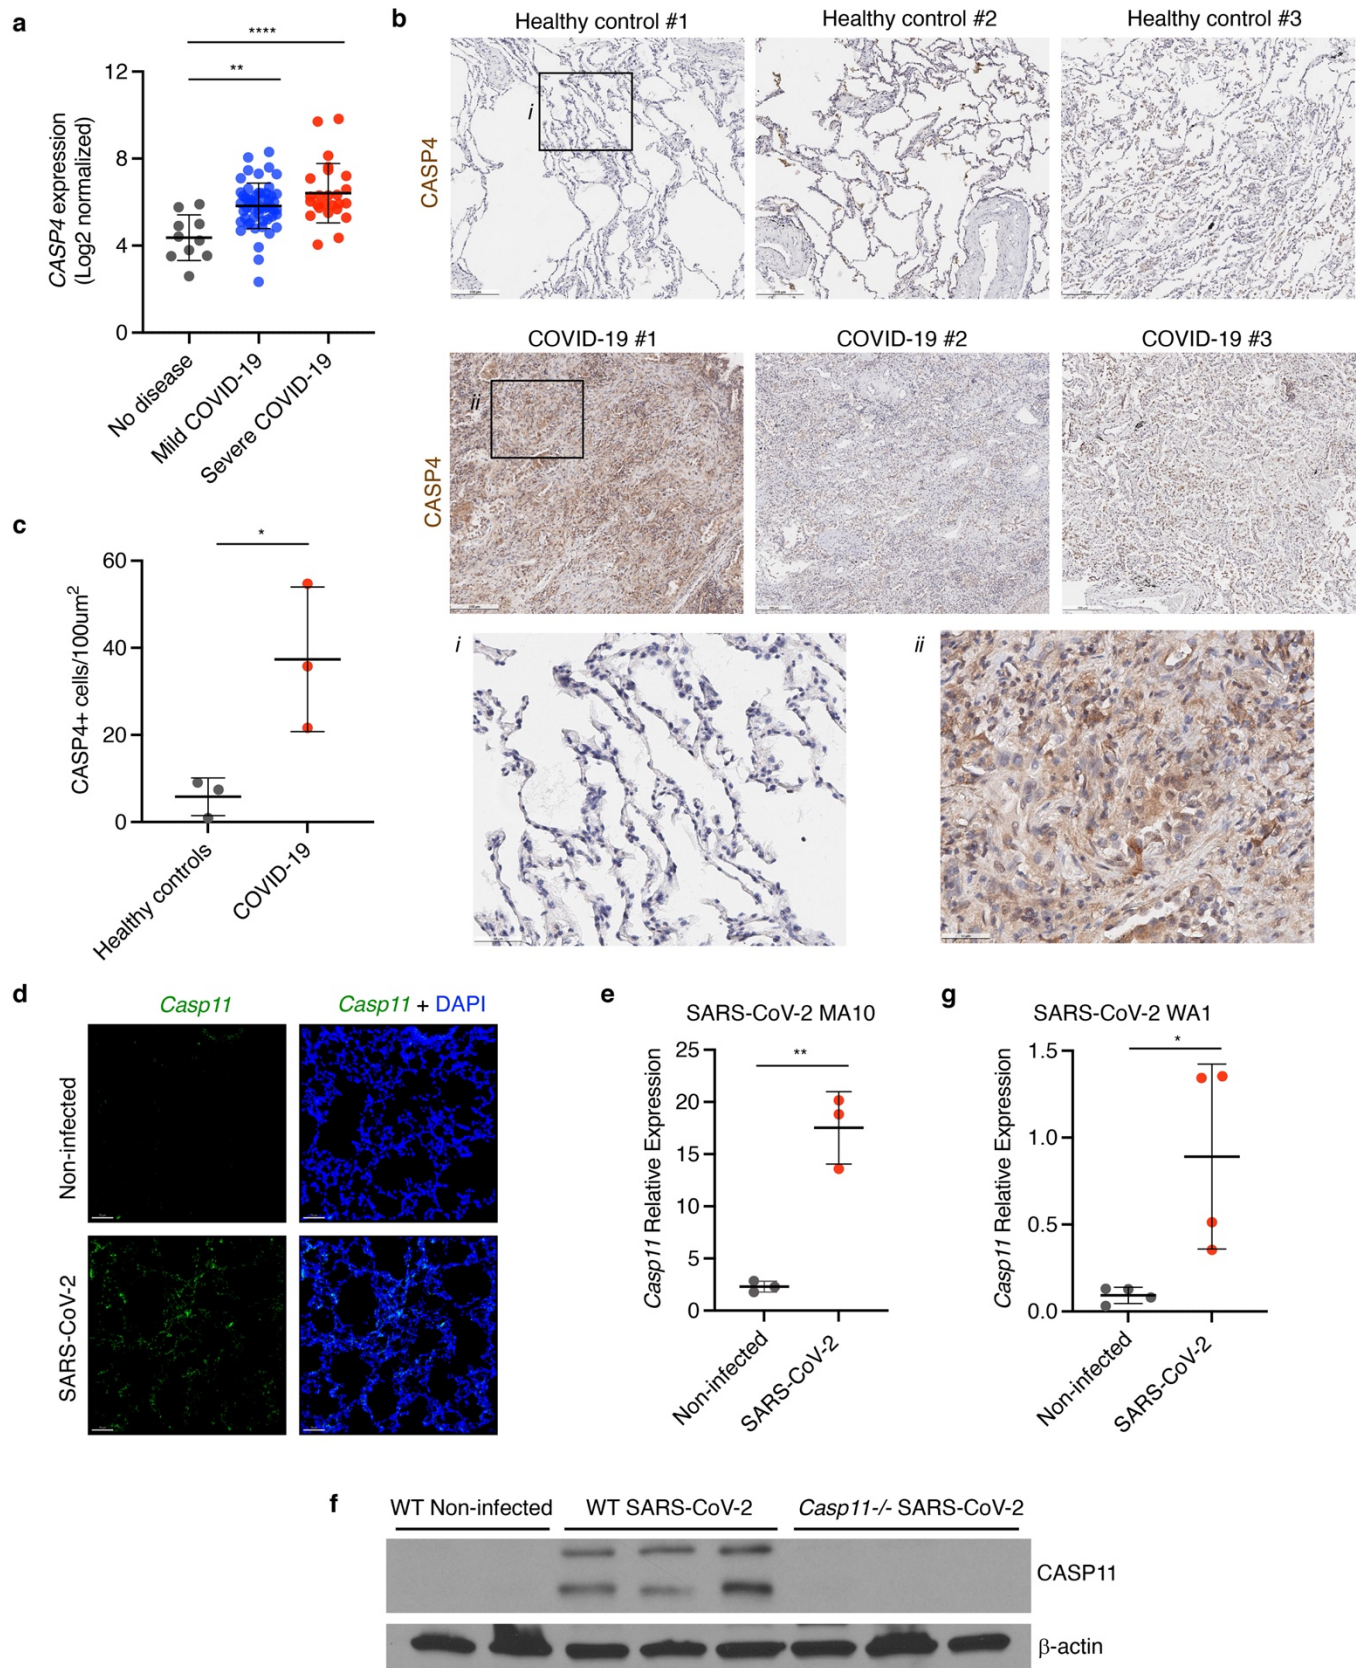

**Figure 1: CASP4 is upregulated in humans and mice infected with SARS-CoV-2.** **a**, CASP4 expression levels from RNA sequencing of nasopharyngeal swab samples from patients with no disease, mild SARS-CoV-2, or severe SARS-CoV-2 [GSE145926], one way ANOVA with Tukey's multiple comparisons test. **b**, Human lung samples from 3 donors with healthy lungs or from 3 donors who died of SARS-CoV-2 were stained for

CASP4 (brown). Black boxes (*i, ii*) outline zoomed regions. **c**, Quantification of CASP4 positive cells from lungs in **b**, unpaired t test. **d-f**, Mice were infected for 4 days with mouse adapted SARS-CoV-2 (MA10,  $10^5$  pfu). **d**, *Casp11* RNA (green, RNAscope *in situ* hybridization) and DAPI (blue) were visualized (3D Intensity projection image) in lung sections using 20x objective. **e**, *Casp11* RNA levels were quantified in lung samples (N=3) by qRT-PCR, unpaired t test. **f**, CASP11 protein levels in lungs described in **d** (N=3) were examined by Western blot. **g**, K18-hACE2 mice were infected for 4 days with human SARS-CoV-2 (WA1,  $10^5$  pfu) and *Casp11* RNA levels were quantitated in lung samples (N=4) by qRT-PCR, unpaired t test. \* $p < 0.05$ , \*\* $p < 0.005$ , \*\*\*\* $p < 0.0001$ .

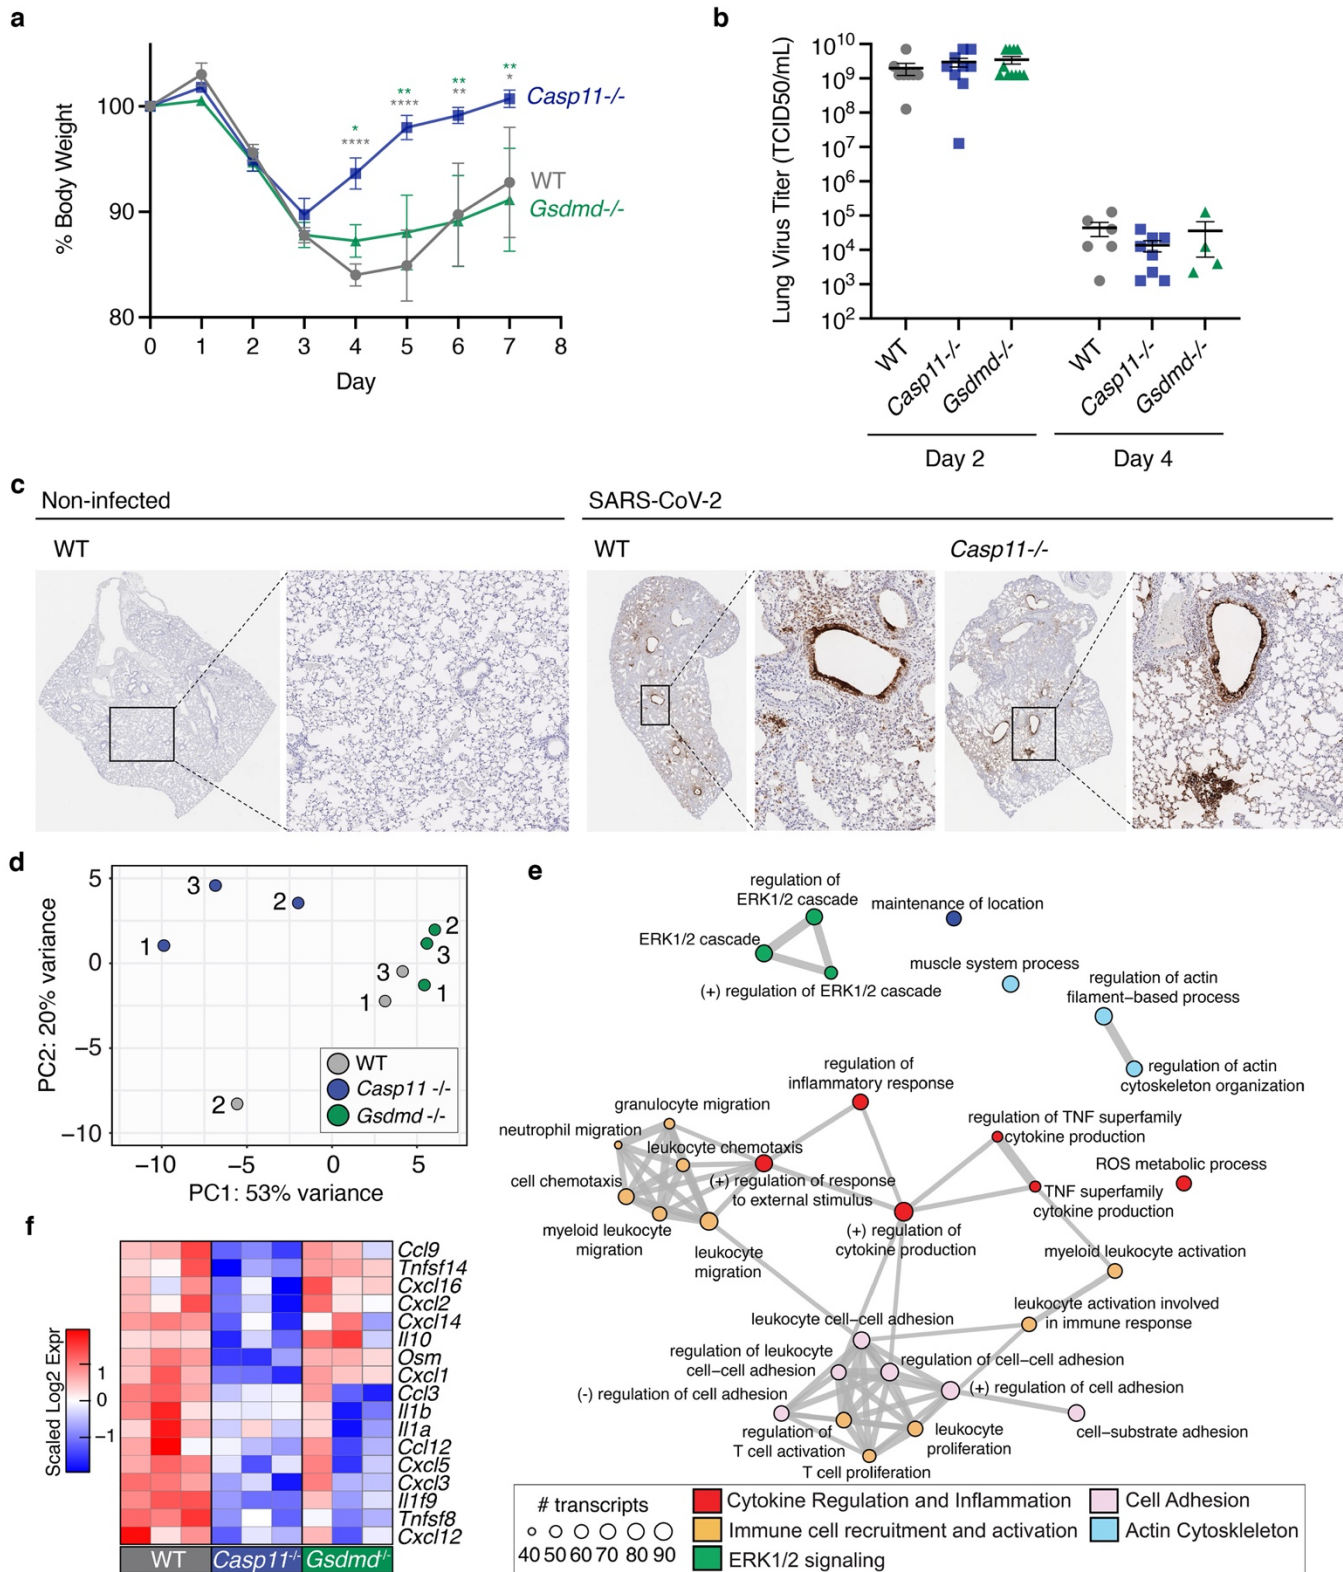

**Figure 2: *Casp11*<sup>-/-</sup> mice show decreased SARS-CoV-2 infection severity without affecting viral titers but by modulating specific inflammatory programs.** **a-c**, WT, *Casp11*<sup>-/-</sup> and *Gsdmd*<sup>-/-</sup> mice were infected with SARS-CoV-2 (MA10, 10<sup>5</sup> pfu). Weight loss was tracked for 7 d, \*p<0.05, \*\*p<0.005, \*\*\*\*p<0.0001, ANOVA with Bonferonni's multiple comparisons test (**a**), Day 0-4 WT (N=7), *Casp11*<sup>-/-</sup> (N=10), *Gsdmd*<sup>-/-</sup> (N=9); Day 5-7 WT (N=4), *Casp11*<sup>-/-</sup> (N=7), *Gsdmd*<sup>-/-</sup> (N=6). **b**, TCID50 viral titers were quantified in lung tissue homogenates. **c**, Sections from non-infected control lungs or lungs collected at 4 days post-infection were stained for SARS-CoV-2 nucleocapsid protein (brown staining, images representative of at least 3 mice per group). **d-f**, WT, *Casp11*<sup>-/-</sup>,



and *Gsdmd*<sup>-/-</sup> mice (N=3) were infected with SARS-CoV-2 (MA10, 10<sup>5</sup> pfu) for 2 days. RNA was extracted from lungs and subjected to RNA sequencing. **d**, Principal component analysis (PCA) of SARS-CoV2-infected lung gene expression with points representing individual WT (grey), *Casp11*<sup>-/-</sup>(blue), and *Gsdmd*<sup>-/-</sup> (green) mice. **e**, Top 30 significant Gene Ontology Biological Pathways are depicted. Node size indicates the number of transcripts within each functional category. Edges connect overlapping gene sets. Numbers represent individual replicates and color indicates relative upregulation (red) or downregulation (blue) in gene expression. **f**, Heatmap of significantly changed cytokine and chemokine genes when comparing *Casp11*<sup>-/-</sup> infected lungs versus WT. Expression scaling is relative to WT and *Gsdmd*<sup>-/-</sup> mice for comparisons (N=3) (p<0.05)..

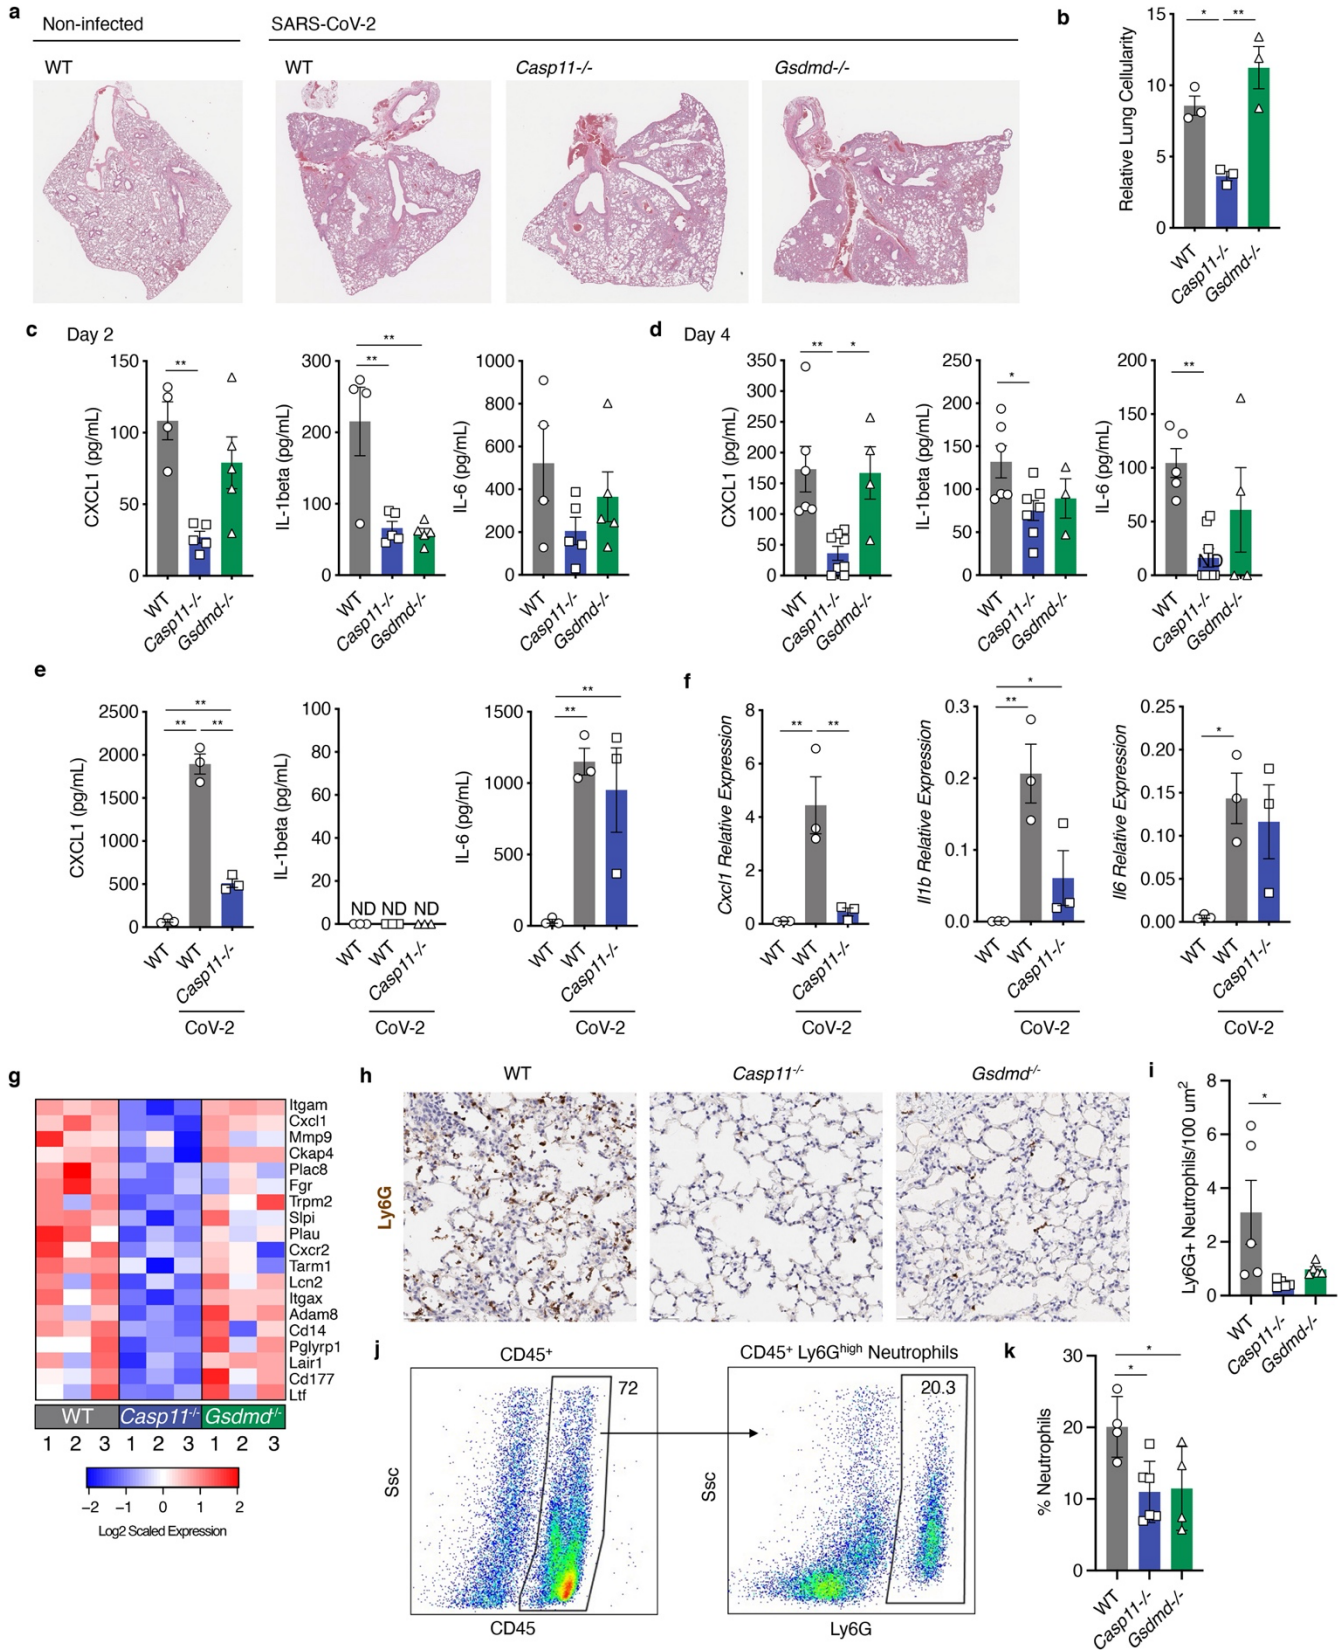

**Figure 3: *Casp11*<sup>-/-</sup> mice show decreased lung inflammation, less neutrophil recruitment, and altered neutrophil function in response to SARS-CoV-2 infection. a-b**, WT and *Casp11*<sup>-/-</sup> mice were infected with SARS-CoV-2 (MA10, 10<sup>5</sup> pfu). **a**, Lung sections from day 4 post-infection were stained with H&E to visualize lung damage and airway consolidation. **b**, Lung sections as in **a** were analyzed by the color deconvolution method to quantify cellularity as an indicator of cellular infiltration and alveolar wall thickening, ANOVA with Tukey's multiple comparisons test. **c,d**, Lung homogenates from 2 or 4 days post-infection were analyzed by

ELISA for detection of CXCL1, IL-1 $\beta$ , or IL-6, ANOVA with Tukey's multiple comparisons test. **e,f**, Macrophages were purified from lungs of mice of the indicated genotype. The cells were infected with mouse adapted SARS-CoV-2 (MOI 1) for 24 h. Cell supernatants were analyzed by ELISA, or cellular RNA was analyzed by qRT-PCR for the indicated chemokine/cytokines, ANOVA with Tukey's multiple comparisons test. **g**, Heatmap of significantly changed neutrophil-related genes comparing *Casp11*<sup>-/-</sup> infected lungs versus WT (p<0.05). Expression scaling is relative to WT and *Gsdmd*<sup>-/-</sup> mice for comparisons. Numbers represent individual replicates and color indicates relative upregulation (red) or downregulation (blue) in gene expression. **h**, Lung sections of day 2 SARS-CoV-2-infected WT, *Casp11*<sup>-/-</sup> and *Gsdmd*<sup>-/-</sup> mice (N=5) stained with neutrophil marker Ly6G and quantified in **i**. **j**, Flow cytometry of lungs homogenates from mice WT (N=4), *Casp11*<sup>-/-</sup> (N=6), *Gsdmd*<sup>-/-</sup> (N=4) as in **h** and quantified in **k**. \*p<0.05, \*\*p<0.005.

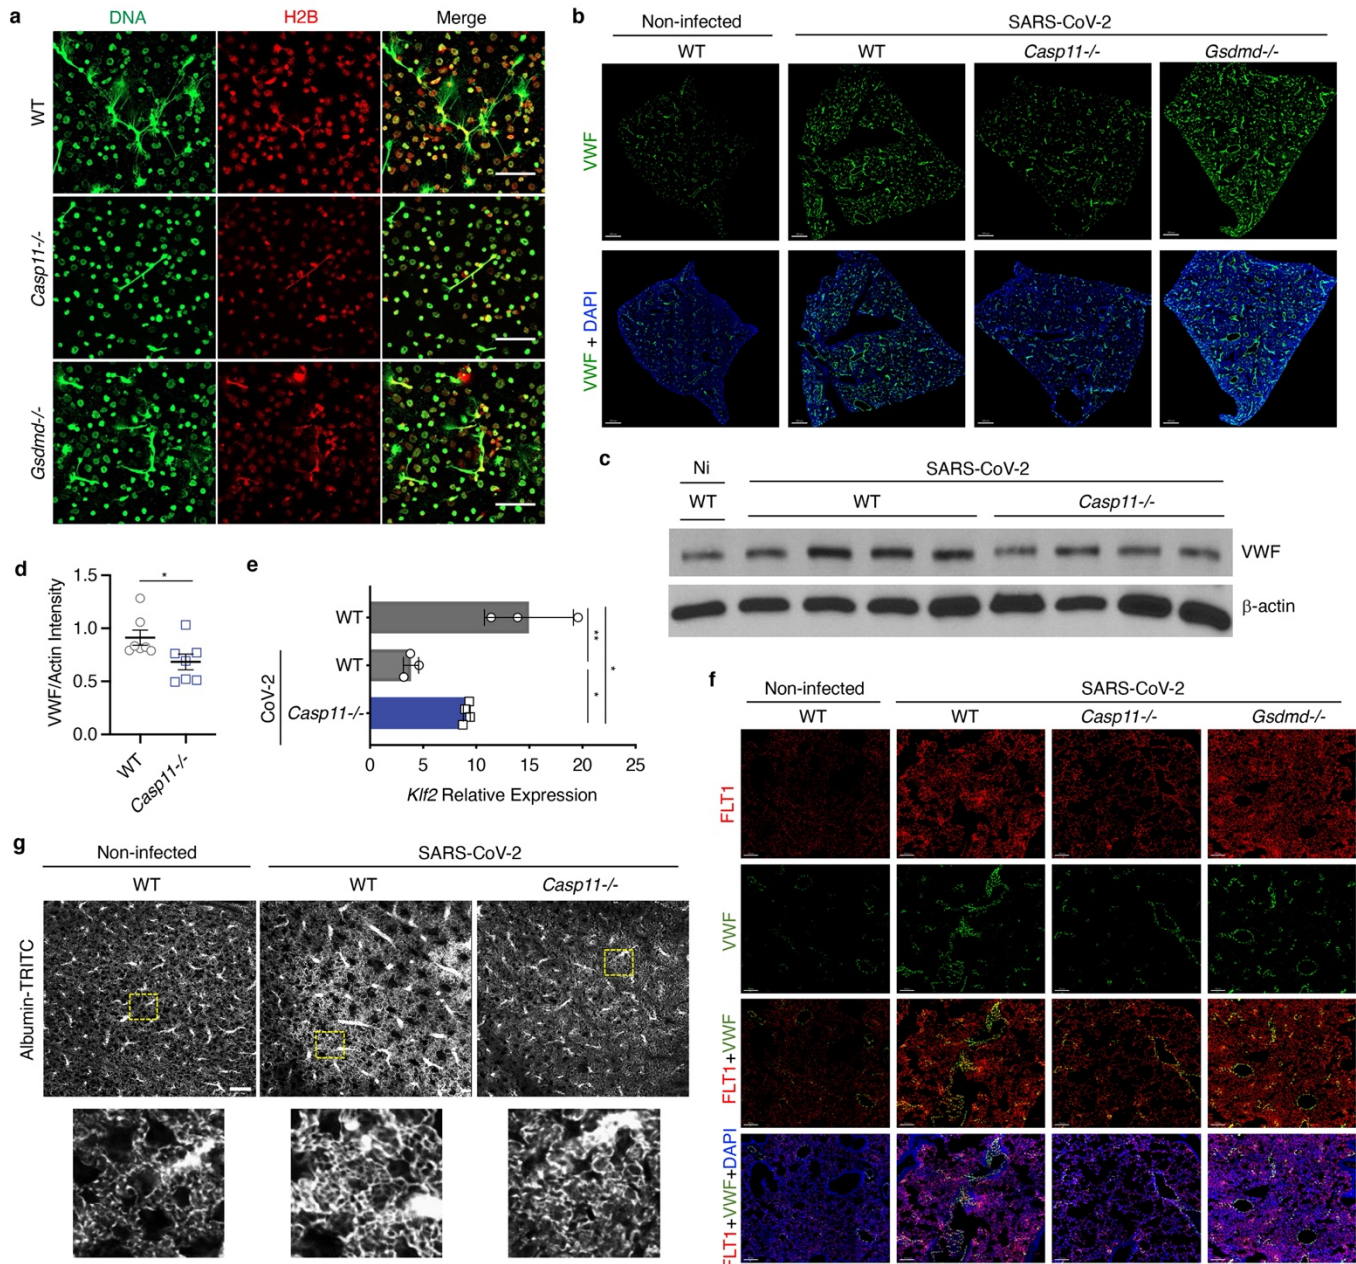

**Figure 4: *Casp11*<sup>-/-</sup> neutrophils undergo less NETosis and *Casp11*<sup>-/-</sup> mice show decreased indicators of coagulopathy in lungs after SARS-CoV-2 infection.** **a**, Neutrophils from WT, *Casp11*<sup>-/-</sup> and *Gsdmd*<sup>-/-</sup> mice were treated with PMA and NET formation was visualized by staining with anti-mouse Histone 2b (red), and anti-dsDNA (green). Images were captured at 60x magnification. **b-g**, WT, *Gsdmd*<sup>-/-</sup>, and *Casp11*<sup>-/-</sup> mice were infected with SARS-CoV-2 (MA10, 10<sup>5</sup> pfu). Lungs were collected at day 4 post-infection. **b**, RNA for VWF (green) was stained by RNAscope *in situ* hybridization, and nuclei are stained with DAPI (blue). Images were captured by a 20x objective in a 3D stitched panoramic view. Intensity projection images were created using IMARIS software. **c**, Western blotting of lung homogenates from non-infected WT and SARS-CoV-2-infected WT and *Casp11*<sup>-/-</sup> mice as described in **a** were quantified in **d**, unpaired t test. **e**, qRT-PCR quantification of KLF2 in the lungs of mice as described in **b**, unpaired t test. **f**, Confocal microscopy for the colocalization of VWF RNA (green) with endothelial VEGF receptor subtype 1 (FLT1, red) in the lungs of mice as described in **b**. Nuclei were stained with DAPI (blue). Images were captured with a 20x objective in a z-stack 3D view and visualized using intensity projection function of IMARIS software. **g**, Vasculature imaging of intact lungs 4 days post-infection. Panel below, higher-magnification view of the regions in yellow boxes. Scale bar, 200 microns. \*p<0.05, \*\*p<0.005.

## Supplementary figures

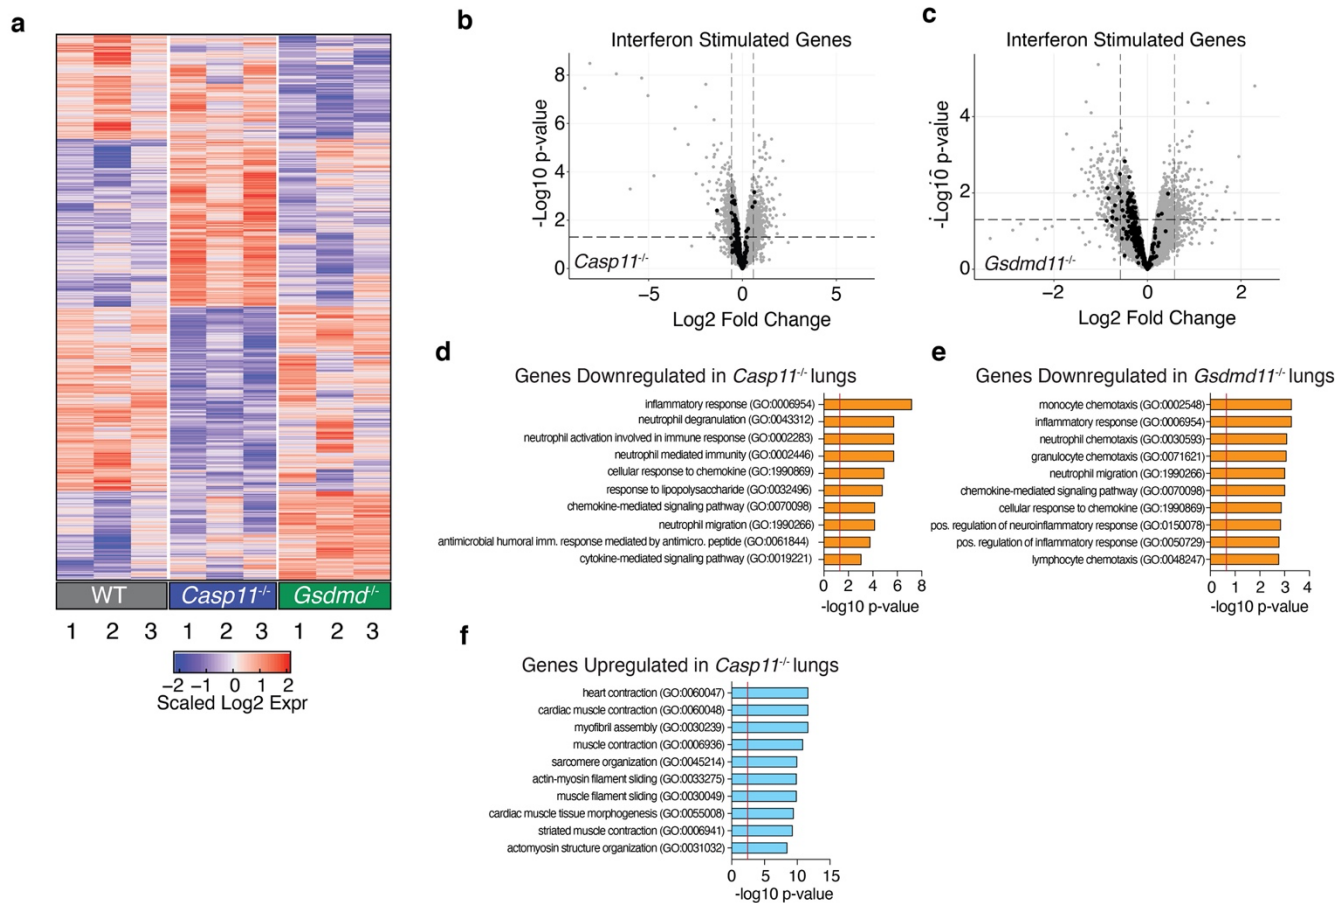

**Supplementary Fig. 1: Changes in inflammatory responses in *Casp11*<sup>-/-</sup> and *Gsdmd*<sup>-/-</sup> SARS-CoV-2-infected lungs.** **a**, Heat map of significant gene expression changes (p-value < 0.05). Depicted genes were chosen based on comparisons relative to WT. Color indicates relative upregulation (red) or downregulation (blue) in gene expression. **b-c**, Statistical analysis of ISG expression in *Casp11*<sup>-/-</sup> and *Gsdmd*<sup>-/-</sup> infected lungs relative to WT. Each point represents transcripts within the dataset. 300 IFN $\beta$ -responsive ISGs are highlighted in black. Dashed lines represent LFC and p-value cutoffs (LFC [0.58] and p-value 0.05). **d**, Functional enrichment analysis of the top 236 downregulated genes in *Casp11*<sup>-/-</sup> SARS-CoV-2-infected lungs relative to infected WT. Red vertical line represents threshold of significance p-value 0.05. **e**, Functional enrichment analysis of the top 224 downregulated genes in *Gsdmd*<sup>-/-</sup> infected lungs relative to WT infection. Red vertical line represents threshold of significance (p-value < 0.05). **f**, Functional enrichment analysis of 328 upregulated genes in *Casp11*<sup>-/-</sup> infected lungs relative to WT infection.

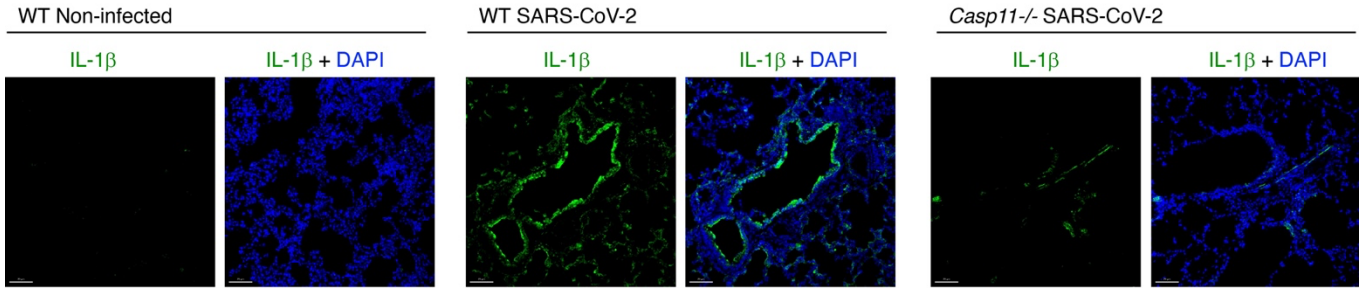

**Supplementary Fig. 2: IL-1 $\beta$  production during SARS-CoV-2 infection is decreased in the absence of *Casp11*.** WT and *Casp11*<sup>-/-</sup> mice were infected with SARS-CoV-2 (MA10, 10<sup>5</sup> pfu). Lungs were collected at day 4 post-infection. Lung tissue was sectioned and stained for IL-1 $\beta$  (green), and DAPI (blue).

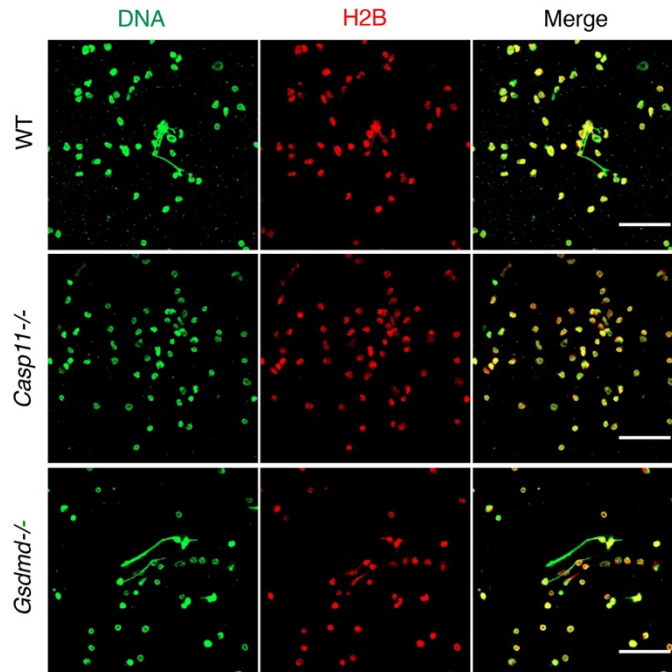

**Supplementary Fig. 3: *Casp11*<sup>-/-</sup> neutrophils are impaired in NET formation.** Neutrophils from WT, *Casp11*<sup>-/-</sup> and *Gsdmd*<sup>-/-</sup> mice were treated with supernatants of SARS-CoV-2-infected epithelial cells from WT mice and NET formation was visualized with staining with anti-mouse Histone 2b (red) and anti-dsDNA (green). Images were captured at 60x magnification.

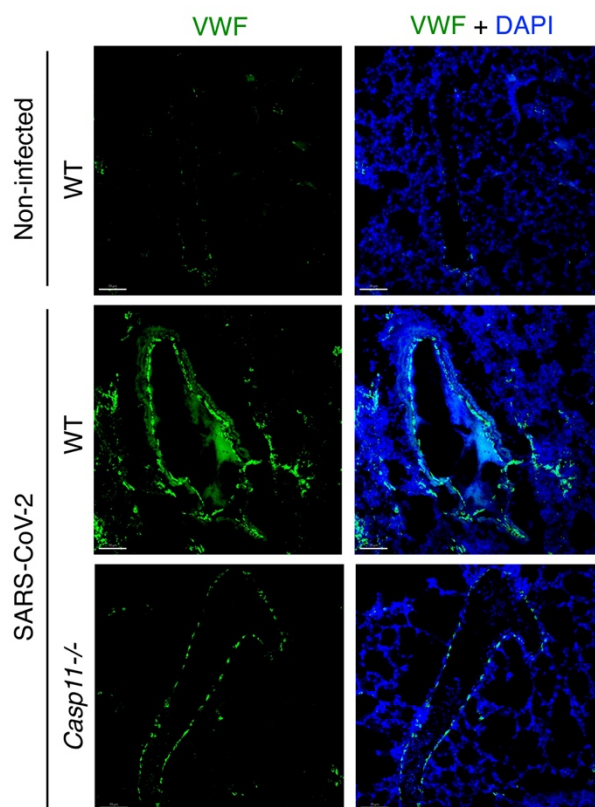

**Supplementary Fig. 4: VWF accumulation at blood vessels during SARS-CoV-2 infection is decreased in the absence of *Casp11*.** Mice were infected with SARS-CoV-2 (MA10,  $10^5$  pfu). Lungs were collected at day 4 post-infection. RNA of VWF was detected by RNAscope *in situ* hybridization (green) and nuclei were staining with DAPI (blue). Images were captured by a 20x objective. Full lung stitched images are shown in main text Fig. 4b.

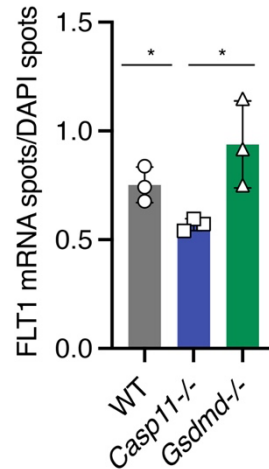

**Supplementary Fig. 5 FLT1 is downregulated in *Casp11*<sup>-/-</sup> SARS-CoV-2-infected lungs.**

Quantification of *in situ* hybridization RNAscope staining of endothelial VEGF receptor subtype 1 (FLT1) in lung sections. Mice were infected with SARS-CoV-2 (MA10, 10<sup>5</sup> pfu). Lungs were collected at day 4 post-infection. Original Images were captured by a 20x objective in a 3D stitched panoramic view representing the whole lung in x,y and z in lung sections of samples described in 4f . DAPI and FLT1 mRNA spots were quantified by using the spot function in IMARIS software. Unpaired t test. \*p<0.05

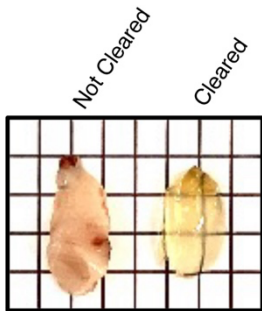

**Supplementary Fig. 6: Example clearing of lungs for vascular imaging.** Representative photograph of lungs with and without tissue clearing.



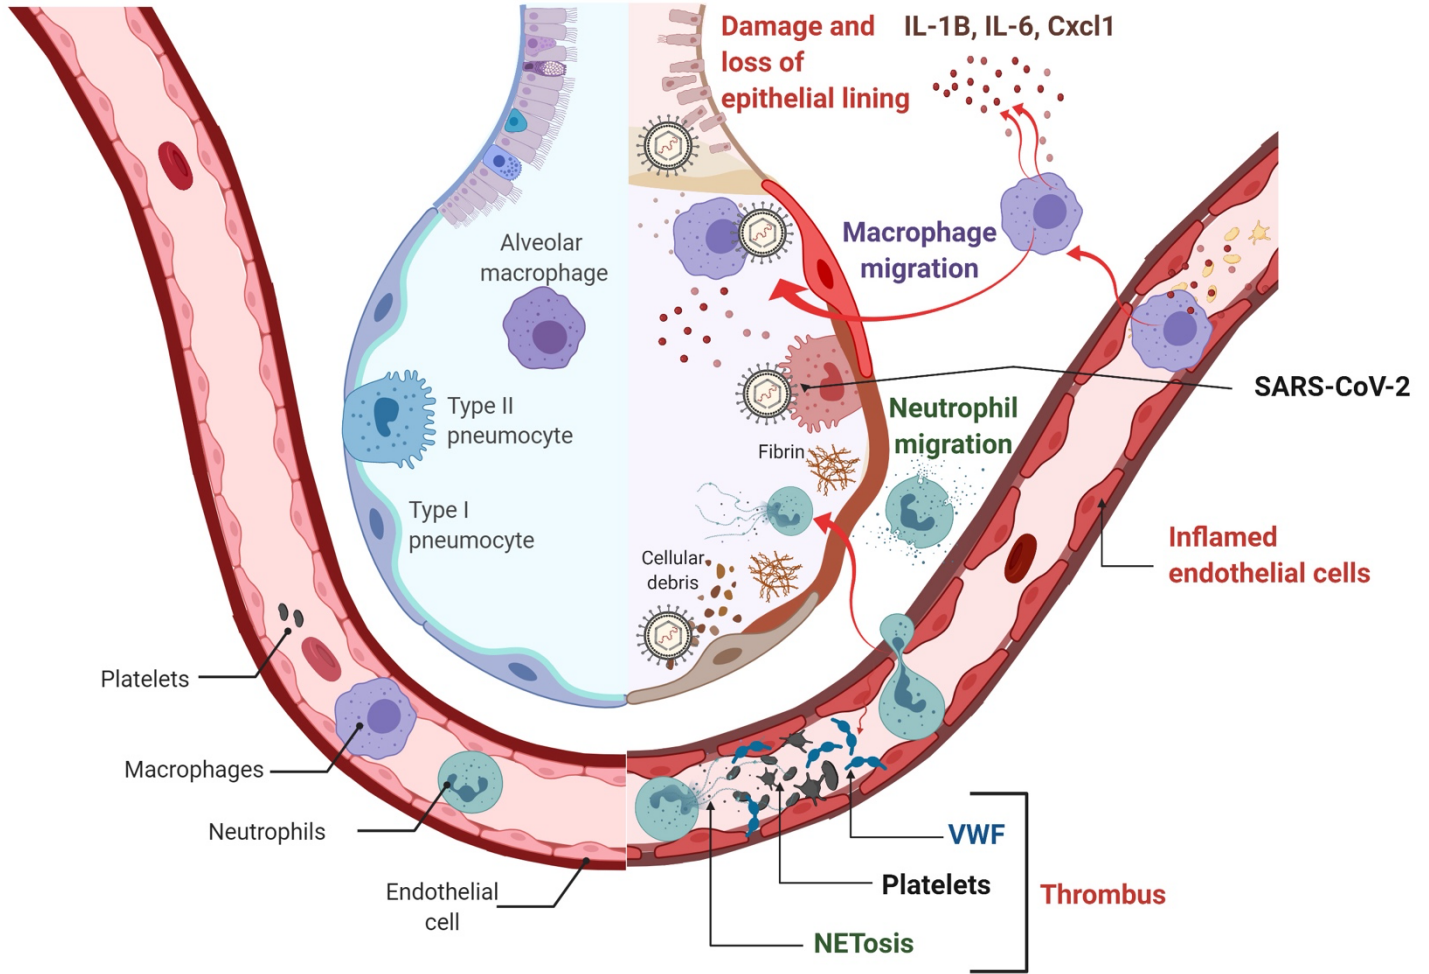

**Supplementary Fig. 7: Casp11-mediates hyperinflammation, neutrophil infiltration, NETosis, thrombus formation and vascular damage during SARS-CoV-2 infection.**
